# Supplementary material for: Camrelizumab with or without Autologous Cytokine-induced Killer Cell Therapy in Patients with Refractory Clear Cell Renal Cell Carcinoma: A Randomized Pilot Study
Source: Research Square preprint supplement (doi:10.21203/rs.3.rs-7792293/v1), 2025-11-13
Supplement: Supplementary file 1 [file 1ced2eee1e1be24d8e7f2328.docx]

RESEARCH PROTOCOL

CAMRELIZUMAB (SHR-1210) WITH OR WITHOUT CYTOKINE-INDUCED KILLER CELLS FOR METASTATIC RENAL CLEAR CELL CARCINOMA: A SINGLE-CENTER, PROSPECTIVE, RANDOMIZED CONTROLLED CLINICAL TRIAL

**PROTOCOL IDENTIFICATION**

**Full Title:** Camrelizumab (SHR-1210) with or without Cytokine-Induced Killer Cells for Metastatic Renal Clear Cell Carcinoma: A Single-Center, Prospective, Randomized Controlled Clinical Trial

**Short Title:** PD1-CIK-mRCC Trial

**Protocol Code:** PD1-CIK-mRCC

**Protocol Version:** Version 1.0

**Protocol Date:** 29 October 2018

**Clinical Trial Registration:**

ClinicalTrials.gov Identifier: NCT03987698

Registration Date: 17 June 2019

**Regulatory Approval:**

National Medical Products Administration (NMPA) Drug Approval Number: S20190027

**SPONSOR AND PRINCIPAL INVESTIGATOR**

**Sponsor:**

Department of Biotherapy, Tianjin Medical University Cancer Institute and Hospital

Address: Huanhu Xi Road, Hexi District, Tianjin 300060, China

Tel: +86-22-23340123

Fax: +86-22-23537796

**Principal Investigator:**

Xiubao Ren, M.D., Ph.D.

Title: Director, Department of Biotherapy and Department of Immunology

Institution: Tianjin Medical University Cancer Institute & Hospital

Address: Huanhu Xi Road, Hexi District, Tianjin 300060, China

Tel: +86-22-23340123-3173

Fax: +86-22-23537796

Email: renxiubao@tjmuch.com

**Co-Investigators:**

Shuzhan Li, Jing Qin, Qian Sun, Hua Zhao, Yanjuan Xiong, Yang Wang, Ying Han, Jiali Zhang, Weihong Zhang, Meng Shen, Fan Yang, Baozhu Ren, Li Zhou, Runmei Li, Zhenzhen Hui, Xiao Tian, Shui Cao, Weijiao Du, Wenwen Yu, Liang Liu, Xinwei Zhang

**ETHICS APPROVAL**

This study was approved by the Ethics Committee of Tianjin Medical University Cancer Hospital and Institute:

Approval Number: E2017232

Approval Date: 24 November 2017

Informed Consent Version: Approved by Ethics Committee on 24 November 2017

RESEARCH PROTOCOL SUMMARY

**Background:**

Renal cell carcinoma (RCC) represents a significant clinical challenge, with clear cell RCC accounting for 80-90% of cases. While immune checkpoint inhibitors (ICIs), particularly PD-1 inhibitors, have revolutionized treatment, response rates remain modest at approximately 25% in second-line settings. Cytokine-induced killer (CIK) cells represent an adoptive immunotherapy approach demonstrating promising antitumor activity in preliminary studies. Pre-clinical evidence suggests that PD-1 blockade may enhance CIK cell cytotoxicity by reversing inhibitory checkpoint molecule upregulation during ex vivo expansion.

**Rationale:**

This investigator-initiated trial (IIT) was designed to explore whether the addition of autologous CIK cells to camrelizumab (an anti-PD-1 monoclonal antibody) could improve clinical outcomes compared to camrelizumab monotherapy in patients with metastatic clear cell RCC who progressed after first-line interferon-α or tyrosine kinase inhibitor (TKI) therapy.

**Study Design:**

Single-center, prospective, open-label, randomized controlled phase II exploratory trial with 1:1 randomization to:

**Experimental Arm:** Camrelizumab + autologous CIK cells

**Control Arm:** Camrelizumab monotherapy

**Primary Objective:**

To evaluate progression-free survival (PFS) according to RECIST 1.1 criteria.

**Secondary Objectives:**

Overall survival (OS)

Objective response rate (ORR)

Disease control rate (DCR)

Quality of life (EORTC QLQ-C30)

Safety and tolerability

**Study Population:**

Patients with histologically confirmed metastatic clear cell RCC who experienced disease progression after interferon-α or TKI therapy.

**Sample Size:**

Originally Planned: 60-90 patients (30-45 per arm)

Actually Enrolled: 21 patients (12 control arm, 9 experimental arm)

Reason for Early Termination: COVID-19 pandemic and approval of camrelizumab plus axitinib as first-line standard-of-care resulted in recruitment challenges. The trial was prematurely discontinued in May 2020 without protocol amendments.

**Study Period:**

Actual Start Date: April 2019

Early Termination Date: May 2020

Data Cutoff: May 2025

Median Follow-up: 62.23 months (minimum 41 months)

**Interventions:**

Control Arm (Camrelizumab Monotherapy):

Camrelizumab 200 mg IV on Day 1 of each 21-day cycle

Experimental Arm (Camrelizumab + CIK):

Camrelizumab 200 mg IV on Day 1 of each 21-day cycle

Autologous CIK cells 1×10¹⁰ cells IV on Day 14 of each 21-day cycle for 6 cycles

Treatment continued until confirmed disease progression, unacceptable toxicity, patient withdrawal, or investigator decision.

**TABLE OF CONTENTS**

**INTRODUCTION**

SECTION 1: INTRODUCTION 8

1.1. Background and Scientific Justification 8

1.2. Cytokine-Induced Killer (CIK) Cells: Rationale for Combination 9

1.3. Rationale for Combining PD-1 Inhibition with CIK Cells 10

1.4. Study Rationale and Knowledge Gap 10

1.5. Study Context and Early Termination 11

SECTION 2: STUDY OBJECTIVES 11

2.1. Primary Objective 11

2.2. Secondary Objectives 11

2.3. Exploratory Objectives 11

SECTION 3: STUDY DESIGN 12

3.1. Overall Study Design 12

3.2. Study Schema 13

3.3. Randomization and Treatment Allocation 13

3.4. Study Duration and Key Milestones 14

SECTION 4: STUDY POPULATION 14

4.1. Inclusion Criteria 14

4.2. Exclusion Criteria 16

4.3. Subject Withdrawal Criteria 17

4.4. Follow-up After Treatment Discontinuation 18

4.5. Lost to Follow-up 18

SECTION 5: INTERVENTIONS AND TREATMENT 18

5.1. Study Treatments 18

5.1.1. Control Arm (Arm A): Camrelizumab Monotherapy 18

5.1.2. Experimental Arm (Arm B): Camrelizumab + Autologous CIK Cells 19

5.2. Camrelizumab (SHR-1210) Drug Product Information 19

5.3. Autologous CIK Cell Manufacturing Protocol 20

5.3.1. PBMC Collection via Leukapheresis 20

5.3.2. CIK Cell Culture Protocol (14-Day Culture) 20

5.3.3. CIK Cell Release Criteria 22

5.4. Treatment Administration and Monitoring 23

5.4.1. Camrelizumab Infusion Procedure 23

5.4.2. CIK Cell Infusion Procedure 24

5.5. Dose Modifications and Treatment Delays 24

5.5.1. Camrelizumab Dose Modifications 24

5.5.2. CIK Cell Dose Modifications 27

SECTION 6: STUDY PROCEDURES AND ASSESSMENTS 27

6.1. Study Schedule of Assessments 27

6.2. Screening Period (Days -30 to -1) 30

6.3. Treatment Period 32

6.3.1. Cycle 1, Day 1 (First Treatment) 32

6.3.2. Cycle 1, Day 14 (CIK Cell Infusion, Arm B Only) 32

6.3.3. Subsequent Cycles (Day 1 of Each 21-Day Cycle) 33

6.3.4. Tumor Response Assessment (Every 6 Weeks) 33

6.4. End-of-Treatment Visit (Within 30 Days of Last Dose) 33

6.5. Long-term Follow-up Period (After Treatment Discontinuation) 34

SECTION 7: EFFICACY EVALUATION 35

7.1. Tumor Response Assessment (RECIST 1.1) 35

7.1.1. General Principles 35

7.1.2. Response Definitions (RECIST 1.1) 35

7.2. Progression-Free Survival (PFS) – Primary Endpoint 36

7.3. Overall Survival (OS) – Secondary Endpoint 36

7.4. Objective Response Rate (ORR) – Secondary Endpoint 37

7.5. Disease Control Rate (DCR) – Secondary Endpoint 37

7.6. Duration of Response (DOR) – Secondary Endpoint 37

SECTION 8: SAFETY EVALUATION 37

8.1. Adverse Event Definitions and Classification 37

8.1.1. Adverse Event (AE) 37

8.1.2. Serious Adverse Event (SAE) 38

8.2. Management of Immune-Related Adverse Events (irAEs) 38

8.2.1. General Principles 38

8.2.2. Immune-Related Pneumonitis 39

8.2.3. Immune-Related Colitis/Diarrhea 39

8.2.4. Immune-Related Hepatitis 40

SECTION 9: STATISTICAL CONSIDERATIONS 40

9.1. Sample Size Calculation 40

9.2. Analysis Populations 41

9.2.1. Intention-to-Treat (ITT) Population 41

9.2.2. Modified ITT (mITT) Population 41

9.2.3. Evaluable-for-Efficacy (EE) Population 41

9.2.4. Safety Population 41

9.3. Statistical Methods for Efficacy 42

9.3.1. Primary Endpoint: Progression-Free Survival (PFS) 42

9.3.2. Secondary Endpoint: Overall Survival (OS) 42

9.3.3. Secondary Endpoint: Objective Response Rate (ORR) 42

9.3.4. Secondary Endpoint: Disease Control Rate (DCR) 43

9.3.5. Secondary Endpoint: Duration of Response (DOR) 43

9.3.6. Secondary Endpoint: Quality of Life (EORTC QLQ-C30) 43

9.4. Statistical Methods for Safety 43

9.5. Interim Analysis 44

9.6. Multiplicity Adjustment 44

9.7. Missing Data 44

9.8. Software 44

SECTION 10: ETHICAL AND REGULATORY CONSIDERATIONS 44

10.1. Ethical Conduct of the Study 44

10.2. Institutional Review Board / Ethics Committee 45

10.3. Regulatory Approval 46

10.4. Informed Consent Process 46

10.5. Confidentiality and Data Protection 47

SECTION 11: DATA MANAGEMENT AND QUALITY ASSURANCE 47

11.1. Case Report Forms (CRFs) 47

11.2. Source Documents 48

11.3. Data Quality Control 48

11.4. Study Monitoring 48

11.5. Audits and Regulatory Inspections 49

11.6. Record Retention 49

SECTION 12: STUDY ADMINISTRATION 49

12.1. Protocol Amendments 49

12.2. Study Termination 50

12.3. Study Completion 50

12.4. Funding and Conflicts of Interest 51

12.5. Publication Policy 51

SECTION 13: REFERENCES 52

SECTION 14: APPENDICES 53

APPENDIX A: ECOG Performance Status Scale 53

APPENDIX B: EORTC QLQ-C30 Questionnaire (Version 3.0) 54

APPENDIX C: RECIST 1.1 Criteria Summary 57

APPENDIX D: NCI-CTCAE Version 4.0 Grading (Selected AEs) 58

APPENDIX E: INFORMED CONSENT FORM 60

# SECTION 1: INTRODUCTION

## 1.1. Background and Scientific Justification

Renal cell carcinoma (RCC) is the most common malignancy of the urinary system and a leading cause of cancer-related mortality. In China, approximately 66,800 new cases and 23,400 deaths from RCC were reported in 2015. Clear cell RCC accounts for 80-90% of all RCC cases. While surgical resection remains the primary curative treatment for localized disease, approximately 30% of patients develop recurrence or distant metastases within three years post-surgery. For advanced or metastatic RCC (mRCC), systemic therapy is the mainstay of treatment.

Historically, mRCC was treated with cytokine-based immunotherapy, including interferon-α (IFN-α) and interleukin-2 (IL-2), which demonstrated modest objective response rates (ORR) of 10-15% and median progression-free survival (PFS) of 4-5 months. The advent of vascular endothelial growth factor receptor (VEGFR) tyrosine kinase inhibitors (TKIs), such as sunitinib and sorafenib, significantly improved outcomes, achieving ORRs of 30-40%, median PFS of 8-11 months, and overall survival (OS) of 2-3 years. However, TKI therapy is associated with substantial toxicities, including diarrhea, nausea, hypertension, hand-foot syndrome, and myelosuppression, often necessitating dose reductions or treatment discontinuation.

The introduction of immune checkpoint inhibitors (ICIs) has revolutionized the treatment landscape for mRCC. The programmed death-1 (PD-1) pathway represents a critical immune escape mechanism exploited by tumor cells. PD-1 inhibitors block the interaction between PD-1 on T cells and its ligands (PD-L1/PD-L2) on tumor or immune cells, thereby restoring antitumor T cell activity. Nivolumab, a fully human IgG4 anti-PD-1 monoclonal antibody, was approved by the U.S. Food and Drug Administration (FDA) in 2015 for the treatment of advanced RCC following prior anti-angiogenic therapy based on the CheckMate 025 trial. This phase III randomized controlled trial (RCT) enrolled 821 patients with advanced or metastatic RCC who had received one or two prior anti-angiogenic therapies. Patients were randomized 1:1 to receive nivolumab or everolimus. Nivolumab demonstrated superior median OS (25.0 vs 19.6 months, HR=0.73, p=0.002), ORR (25% vs 5%, p<0.001), and a more favorable safety profile compared to everolimus. These results established PD-1 inhibition as a standard second-line treatment for mRCC.

Camrelizumab (SHR-1210) is a humanized IgG4 monoclonal antibody against PD-1 developed by Jiangsu Hengrui Medicine Co., Ltd. (China). It has demonstrated antitumor activity across multiple solid tumors and has received regulatory approval in China for various indications. The rationale for investigating camrelizumab in this study was its availability, proven efficacy in RCC, and the opportunity to explore combination strategies within an investigator-initiated trial (IIT) framework.

## 1.2. Cytokine-Induced Killer (CIK) Cells: Rationale for Combination

Cytokine-induced killer (CIK) cells represent a heterogeneous population of immune effector cells generated by ex vivo expansion of peripheral blood mononuclear cells (PBMCs) in the presence of multiple cytokines, including anti-CD3 monoclonal antibody, interferon-γ (IFN-γ), and interleukin-2 (IL-2). CIK cells exhibit potent major histocompatibility complex (MHC)-unrestricted cytotoxicity against tumor cells, with the CD3⁺CD56⁺ subset representing the primary effector population. Compared to other adoptive cell therapy approaches, CIK cells demonstrate several advantages: rapid expansion kinetics, broad tumor-killing spectrum, minimal toxicity, and negligible impact on hematopoiesis.

A phase II randomized controlled trial conducted by our research group enrolled 148 patients with metastatic RCC and randomly assigned them 1:1 to receive either autologous CIK cell therapy or combination cytokine therapy (IFN-α + IL-2). The study demonstrated that CIK cell therapy significantly prolonged median OS (111 vs 46 months, p<0.05) and median PFS (12 vs 8 months, p<0.05) with minimal adverse events, establishing the safety and potential efficacy of CIK cells in mRCC.

## 1.3. Rationale for Combining PD-1 Inhibition with CIK Cells

Emerging evidence suggests a mechanistic synergy between PD-1 blockade and CIK cell therapy:

Checkpoint Molecule Upregulation During CIK Expansion: Our laboratory investigations revealed that CIK cells upregulate inhibitory checkpoint molecules, including PD-1, TIGIT, and BTLA, during ex vivo culture. This checkpoint upregulation may limit CIK cell effector function in vivo.

PD-1 Blockade Enhances CIK Cytotoxicity: In vitro studies by Bloemendal et al. demonstrated that PD-1 inhibition significantly augmented IFN-γ secretion by CIK cells and enhanced their cytolytic activity against B-cell lymphoma targets.

Preliminary Clinical Observations: A small retrospective analysis from our institution comparing PD-1 monotherapy to PD-1 plus CIK cells suggested numerically higher response rates in the combination cohort, although this finding requires prospective validation.

Immunological Complementarity: PD-1 inhibitors primarily enhance endogenous T cell responses, while CIK cells provide an exogenous source of activated effector cells. The combination may synergistically amplify both arms of antitumor immunity.

## 1.4. Study Rationale and Knowledge Gap

At the time of protocol development (2018), no prospective randomized data existed evaluating the combination of PD-1 inhibition with CIK cells in mRCC. While both modalities had demonstrated single-agent activity, whether their combination would yield additive or synergistic benefit remained unknown. This investigator-initiated exploratory trial was designed to:

Generate preliminary efficacy and safety data for camrelizumab + CIK cells versus camrelizumab monotherapy

Assess the feasibility of integrating autologous cellular therapy with checkpoint inhibition

Explore correlative biomarkers that may predict response to combination immunotherapy

Inform the design of future adequately powered phase III trials

## 1.5. Study Context and Early Termination

This trial initiated enrollment in April 2019. However, in November 2019, the combination of camrelizumab plus axitinib (a VEGFR-TKI) was approved in China as first-line therapy for advanced RCC based on positive phase III data. Subsequently, the COVID-19 pandemic (beginning December 2019) severely disrupted clinical trial operations globally. These two factors—a shift in standard-of-care and pandemic-related constraints—resulted in insurmountable recruitment challenges. The trial was prematurely terminated in May 2020 after enrolling 21 of the planned 60-90 patients.

IMPORTANT NOTE: Due to the small sample size (n=21) and early termination, this study is significantly underpowered (post-hoc power analysis: ~10% to detect the observed ORR difference). All results should be interpreted as preliminary, exploratory, and hypothesis-generating. The findings require validation in larger, adequately powered prospective trials before clinical recommendations can be made.

# SECTION 2: STUDY OBJECTIVES

## 2.1. Primary Objective

To evaluate and compare progression-free survival (PFS) according to Response Evaluation Criteria in Solid Tumors version 1.1 (RECIST 1.1) in patients with metastatic clear cell renal cell carcinoma treated with camrelizumab plus autologous CIK cells versus camrelizumab monotherapy following progression on first-line interferon-α or tyrosine kinase inhibitor therapy.

## 2.2. Secondary Objectives

To evaluate and compare overall survival (OS) between treatment arms

To evaluate and compare objective response rate (ORR) per RECIST 1.1

To evaluate and compare disease control rate (DCR) per RECIST 1.1

To evaluate and compare duration of response (DOR)

To assess quality of life using the EORTC QLQ-C30 questionnaire

To evaluate the safety and tolerability of camrelizumab with or without CIK cells

## 2.3. Exploratory Objectives

To characterize the immunophenotype of circulating immune cells and infused CIK cells (CD3⁺, CD3⁺CD4⁺, CD3⁺CD8⁺, CD3⁺CD56⁺, CD3⁻CD16⁺CD56⁺, CD4⁺CD25⁺CD127⁻)

To evaluate changes in serum cytokine levels (IL-1 to IL-8, IL-10 to IL-13, IFN-γ, TNF-α, G-CSF, GRO, MIG, MCP) during treatment

To explore potential predictive biomarkers for response to combination immunotherapy

To assess T cell subset distribution (central memory, effector memory, naïve) in peripheral blood

# SECTION 3: STUDY DESIGN

## 3.1. Overall Study Design

This was a single-center, prospective, open-label, randomized controlled phase II exploratory trial conducted at Tianjin Medical University Cancer Institute and Hospital. Eligible patients with histologically confirmed metastatic clear cell renal cell carcinoma who experienced disease progression after first-line interferon-α or tyrosine kinase inhibitor (TKI) therapy were randomized 1:1 to receive:

Control Arm (Arm A): Camrelizumab monotherapy

Experimental Arm (Arm B): Camrelizumab plus autologous cytokine-induced killer (CIK) cells

Randomization was performed centrally using a computer-generated random sequence with permuted blocks to ensure balanced allocation. Due to the nature of the intervention (autologous cellular therapy), blinding of patients and investigators was not feasible. However, radiological tumor assessments were performed by independent radiologists blinded to treatment allocation.

Study Type: Interventional

Study Phase: Phase II

Allocation: Randomized (1:1)

Intervention Model: Parallel Assignment

Masking: Open-label (outcome assessors blinded)

Primary Purpose: Treatment

## 3.2. Study Schema


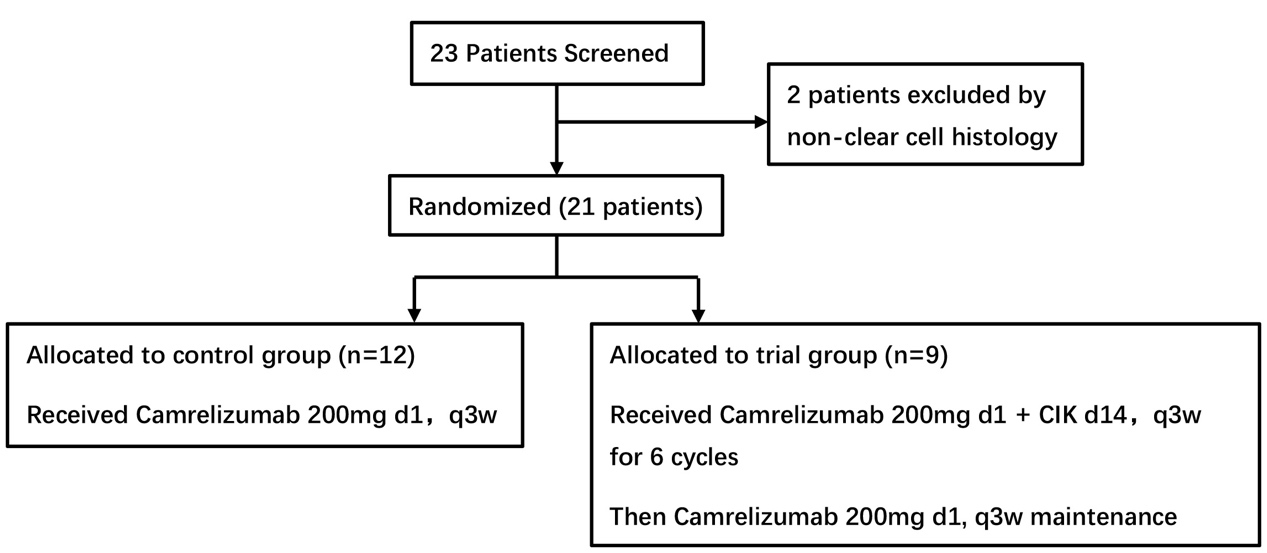


Tumor Assessment Q6W (RECIST 1.1)

Treatment until:

- Confirmed PD

- Unacceptable toxicity

- Patient withdrawal

- Investigator decision

End-of-Treatment Visit (Week 8 post-last dose)

Long-term Follow-up Q8W

Until death, lost to follow-up, or 1 year after last patient enrolled

## 3.3. Randomization and Treatment Allocation

Randomization Method: Eligible patients were randomized 1:1 using a computer-generated randomization sequence with permuted blocks (block size = 4) prepared by an independent statistician not involved in patient care or outcome assessment.

Allocation Concealment: Treatment assignments were concealed in sequentially numbered, opaque, sealed envelopes opened only after confirmation of eligibility and completion of baseline assessments.

Stratification: No stratification factors were employed given the exploratory nature and planned sample size.

## 3.4. Study Duration and Key Milestones

| **MILESTONE** | **DATE** |
| --- | --- |
| Protocol Finalization | 29 October 2018 |
| Ethics Committee Approval | 13 February 2018 |
| Regulatory Approval (NMPA) | March 2019 |
| ClinicalTrials.gov Registration | 17 June 2019 |
| First Patient Enrolled | April 2019 |
| Early Termination Decision | May 2020 |
| Last Patient Last Dose | May 2020 |
| Data Cutoff for Analysis | May 2025 |
| Median Follow-up Duration | 62.23 months (range: 41-72 months) |

Reason for Early Termination: The study was prematurely discontinued after enrolling 21 of the planned 60-90 patients due to: (1) approval of camrelizumab plus axitinib as first-line standard-of-care for mRCC in November 2019, which fundamentally altered the treatment landscape and eligibility pool; and (2) the COVID-19 pandemic beginning December 2019, which severely disrupted clinical trial operations, patient enrollment, and hospital capacity.

# SECTION 4: STUDY POPULATION

## 4.1. Inclusion Criteria

1. Patients must meet all of the following criteria to be eligible for enrollment:
2. Informed Consent: Voluntary written informed consent obtained prior to any study-specific procedures
3. Age: ≥18 years and ≤75 years (inclusive)
4. Life Expectancy: Estimated survival ≥3 months
5. Histological Confirmation: Pathologically confirmed metastatic or unresectable clear cell renal cell carcinoma
6. Prior Therapy: Documented disease progression during or after first-line systemic therapy with:
7. Interferon-α (IFN-α), OR Tyrosine kinase inhibitor (TKI) targeting VEGFR (e.g., sunitinib, sorafenib, pazopanib)
8. Measurable Disease: At least one measurable lesion per RECIST 1.1:
9. CT/MRI: longest diameter ≥10 mm AND/OR malignant lymph nodes: short axis ≥15 mm
10. Performance Status: Eastern Cooperative Oncology Group (ECOG) performance status 0-1 within 7 days prior to randomization
11. Adequate Organ Function (within 14 days prior to first treatment):

**Hematology:**

White blood cell count (WBC) ≥3.5 × 10⁹/L

Absolute neutrophil count (ANC) ≥1.5 × 10⁹/L

Platelet count (PLT) ≥100 × 10⁹/L

Hemoglobin (HGB) ≥90 g/L

**Hepatic:**

Aspartate aminotransferase (AST) <2.5 × upper limit of normal (ULN)[<5 × ULN if liver metastases present]

Alanine aminotransferase (ALT) <2.5 × ULN [<5 × ULN if liver metastases]

Total bilirubin (TBIL) <1.5 × ULN

**Renal:**

Serum creatinine (SCr) <1.25 × ULN, OR

Calculated creatinine clearance ≥50 mL/min (Cockcroft-Gault formula)

**Endocrine:**

Serum cortisol > lower limit of normal (LLN)

Thyroid-stimulating hormone (TSH) within normal limits, OR

Free T3/T4 within normal limits if TSH abnormal

1. Recovery from Prior Therapy: Toxicities from prior anticancer therapy resolved to ≤Grade 1 (NCI-CTCAE v4.0), except alopecia
2. Prior Major Surgery or Radiotherapy:

**Major surgery:** Must have recovered from surgical complications (≥6 months post-surgery)

**Radiotherapy >30 Gy to target lesions:** ≥6 months since completion

**Radiotherapy ≤30 Gy:** ≥4 weeks since completion

1. Contraception (for patients of reproductive potential):

**Female patients:** Negative serum or urine pregnancy test at screening; must use effective contraception (failure rate <1% per year) throughout study treatment and for 6 months after last camrelizumab dose

**Male patients:** Must use barrier contraception throughout study treatment and for 6 months after last camrelizumab dose if partner is of childbearing potential

## 4.2. Exclusion Criteria

1. Patients meeting any of the following criteria are excluded:
2. Other Malignancies:Known progressive or untreated second primary malignancy requiring active treatment. Exceptions: Adequately treated carcinoma in situ (any site), stage I malignancy treated with curative intent, basal/squamous cell skin carcinoma, superficial bladder cancer
3. Prior Allogeneic Transplantation: History of solid organ or allogeneic hematopoietic stem cell transplantation
4. Concurrent Investigational Therapy: Participation in another interventional clinical trial within 4 weeks prior to first study dose
5. Concurrent Immunosuppression: Systemic corticosteroids (>10 mg/day prednisone equivalent) or other immunosuppressive agents within 3 days before first study dose. Exception: Physiologic replacement doses for adrenal/pituitary insufficiency, premedication for taxane chemotherapy (if applicable), inhaled/topical corticosteroids
6. Recent Anticancer Therapy:

Monoclonal antibody therapy within 4 weeks

Chemotherapy, targeted small molecule therapy, or major surgery within 4 weeks

Radiotherapy >30 Gy to target lesions within 6 months

Radiotherapy ≤30 Gy within 4 weeks

Prior Anti-PD-1/PD-L1 Therapy: Previous treatment with anti-PD-1, anti-PD-L1, anti-PD-L2, or anti-CTLA-4 antibody, or any other antibody/drug targeting T cell co-stimulation or checkpoint pathways

1. Active Autoimmune Disease: Diagnosis of active autoimmune disease requiring systemic immunosuppressive therapy within the past 2 years. Exceptions: Type I diabetes mellitus, hypothyroidism managed with hormone replacement, vitiligo, psoriasis not requiring systemic treatment
2. Immunodeficiency or Chronic Viral Infection:

Known HIV infection (AIDS)

Active hepatitis B: HBsAg-positive AND HBV-DNA ≥1×10³ copies/mL (≥200 IU/mL)

Active hepatitis C: Anti-HCV-positive AND HCV-RNA above lower limit of detection

1. Recent Live Vaccine: Receipt of live attenuated vaccine within 4 weeks prior to first study dose. Exception: Inactivated influenza vaccine is permitted; intranasal live attenuated influenza vaccine is not permitted
2. Active CNS Metastases: Untreated brain metastases or leptomeningeal disease. Exception: Patients with treated brain metastases are eligible if: Radiologically stable for ≥4 weeks prior to first dose (confirmed by MRI); Neurologically asymptomatic. No evidence of new or enlarging brain metastases. Off corticosteroids for ≥3 days (or on stable dose ≤10 mg prednisone equivalent/day).
3. Active Infection: Systemic infection requiring IV antimicrobial therapy
4. Uncontrolled Medical Conditions:

Unstable angina, myocardial infarction within 6 months

New York Heart Association (NYHA) Class III-IV congestive heart failure

Uncontrolled hypertension (systolic >160 mmHg or diastolic >100 mmHg despite optimal medical management)

Uncontrolled diabetes mellitus (fasting glucose >11.1 mmol/L despite therapy)

Clinically significant arrhythmia requiring medication

Severe chronic obstructive pulmonary disease with hypoxemia

Psychiatric illness/social situation limiting compliance

Known Hypersensitivity: History of severe hypersensitivity reaction to any component of camrelizumab or other monoclonal antibodies

1. Substance Abuse: Current or recent (within 1 year) history of drug or alcohol abuse
2. Poor Compliance: Inability or unwillingness to comply with study requirements as judged by investigator
3. Pregnancy and Lactation: Pregnant or breastfeeding women. Women of childbearing potential planning pregnancy during study or within 6 months after last camrelizumab dose. Men planning to father a child during study or within 6 months after last camrelizumab dose

## 4.3. Subject Withdrawal Criteria

Patients may be withdrawn from study treatment for the following reasons:

Disease Progression: Confirmed radiological or clinical progression per RECIST 1.1

Note: Pseudoprogression considerations: If initial progression is observed but patient remains clinically stable, treatment may continue with repeat imaging 4-6 weeks later. If progression is not confirmed, treatment continues; if confirmed, treatment is discontinued.

Unacceptable Toxicity: Adverse events that, in the investigator's judgment, pose unacceptable risk to the patient, including:

Grade 4 immune-related adverse events (irAEs)

Grade 3 irAEs not responsive to immunosuppressive therapy or requiring >8 weeks of corticosteroids

Recurrent Grade 3 irAEs despite optimal management

Patient Request: Voluntary withdrawal of consent

Investigator Decision: Clinical deterioration, intercurrent illness, or other safety concerns that preclude continued participation

Non-compliance: Persistent inability or unwillingness to comply with study requirements

Protocol Violation: Major protocol deviations affecting safety or integrity of data

Pregnancy: Confirmed pregnancy during study treatment

Administrative Reasons: Study termination by sponsor, regulatory authority, or ethics committee

## 4.4. Follow-up After Treatment Discontinuation

Patients who discontinue study treatment for any reason other than withdrawal of consent will continue to be followed for:

Safety: AE monitoring for 8 weeks after last dose (or longer if treatment-related AEs persist)

Survival and subsequent therapy: Every 8 weeks until death, withdrawal of consent, or 1 year after last patient enrollment

## 4.5. Lost to Follow-up

Patients are considered lost to follow-up if:

Three documented attempts to contact the patient (phone, mail, email) over a 4-week period are unsuccessful

Patient has not been seen for a scheduled visit and cannot be reached

Investigators must document all efforts made to locate the patient in source documents and case report forms.

# SECTION 5: INTERVENTIONS AND TREATMENT

## 5.1. Study Treatments

### 5.1.1. Control Arm (Arm A): Camrelizumab Monotherapy

Regimen:

Camrelizumab: 200 mg IV infusion on Day 1 of each 21-day cycle

Administration:

Dilute in 100 mL 0.9% sodium chloride for injection

Infuse over 30 minutes via peripheral or central venous catheter

Use a 0.2-micron in-line filter

Duration: Continue until confirmed disease progression, unacceptable toxicity, patient withdrawal, or investigator decision

### 5.1.2. Experimental Arm (Arm B): Camrelizumab + Autologous CIK Cells

Regimen:

Camrelizumab: 200 mg IV on Day 1 of each 21-day cycle (same as Arm A)

Autologous CIK cells: 1 × 10¹⁰ cells IV on Day 14 of each 21-day cycle for 6 cycles

CIK Cell Administration:

Suspend in 100 mL 0.9% sodium chloride with 2% human serum albumin

Infuse over 30-60 minutes

Administered in inpatient or outpatient setting with vital sign monitoring

Duration: Continue both agents until confirmed disease progression, unacceptable toxicity, patient withdrawal, or investigator decision

## 5.2. Camrelizumab (SHR-1210) Drug Product Information

Generic Name: Camrelizumab (recombinant humanized anti-PD-1 monoclonal antibody)

Brand Name: Airuika®

Manufacturer: Jiangsu Hengrui Medicine Co., Ltd., China

Regulatory Approval: NMPA Drug Approval Number: S20190027

Formulation: 200 mg/vial, lyophilized powder for injection

Reconstitution: Reconstitute with 5 mL sterile water for injection; gently swirl (do not shake) until completely dissolved; further dilute in 100 mL 0.9% sodium chloride

Storage: Store at 2-8°C, protect from light; use reconstituted solution within 24 hours

Mechanism of Action: Camrelizumab is a humanized IgG4-kappa monoclonal antibody that binds to PD-1 receptor on T cells, blocking its interaction with PD-L1 and PD-L2 on tumor and antigen-presenting cells. This releases PD-1 pathway-mediated inhibition of immune responses, including antitumor immune responses.

Supply and Accountability: Camrelizumab is provided by Jiangsu Hengrui Medicine Co., Ltd. under an investigator-initiated trial agreement. The investigational site pharmacy maintains drug accountability records per institutional SOPs.

## 5.3. Autologous CIK Cell Manufacturing Protocol

### 5.3.1. PBMC Collection via Leukapheresis

Procedure:

Timing: Day -14 to Day -10 of Cycle 1; repeat before each subsequent cycle (Day 7-10)

Equipment: COBE Spectra or Spectra Optia Apheresis System

Anticoagulation: Citrate-based (ACD-A)

Target Collection: 5-10 × 10⁹ mononuclear cells in ~50 mL apheresis product

Processing Time: Approximately 90-120 minutes

Patient Monitoring: Vital signs every 15 minutes; calcium supplementation as needed for citrate toxicity

Quality Control of Apheresis Product:

Total mononuclear cell count ≥5 × 10⁸ cells

Viability ≥95% (trypan blue exclusion)

CD3⁺ T cells ≥70% of lymphocytes (flow cytometry)

CD8⁺ T cells ≥20% of lymphocytes

CD3⁺CD56⁺ NKT cells ≥1% of lymphocytes

### 5.3.2. CIK Cell Culture Protocol (14-Day Culture)

Culture Facility: Tianjin Medical University Cancer Hospital GMP-compliant Cell Processing Laboratory (ISO Class 7 cleanroom)

Culture Procedure:

Day 0 (Initiation):

Transfer apheresis product to sterile culture bags (Baxter LifeCell, CryoMACS)

Culture medium: X-VIVO 15 serum-free medium (Lonza)

Add initial cytokines:

Anti-CD3 mAb (OKT3): 100 ng/mL (Miltenyi Biotec)

Recombinant human IFN-γ: 1,000 IU/mL (PeproTech)

Adjust cell density to 1-3 × 10⁶ cells/mL

Total volume: 500 mL per culture bag (typically 2 bags/patient)

Incubate at 37°C, 5% CO₂

Day 1:

Add recombinant human IL-2: 1,000 IU/mL (PeproTech)

Continue incubation

Day 5 (First Feeding):

Assess cell viability and proliferation (microscopy)

Add 1,000 mL fresh X-VIVO 15 medium containing:

- IL-2: 1,000 IU/mL

- IFN-γ: 1,000 IU/mL

Continue incubation

Day 9 (Second Feeding and Interim QC):

Assess cell viability, morphology, and proliferation

Collect 50 mL cell suspension for sterility testing (bacterial and fungal cultures)

Add 1,000 mL fresh X-VIVO 15 medium containing:

- IL-2: 1,000 IU/mL

- IFN-γ: 1,000 IU/mL

Continue incubation

Day 12-14 (Harvest and Formulation):

Collect all culture bags into sterile 250-mL conical centrifuge tubes

Centrifuge at 300 × g for 10 minutes at room temperature

Discard supernatant; wash cells 3× with sterile 0.9% sodium chloride

Resuspend final cell pellet in 100 mL 0.9% sodium chloride + 2% human serum albumin

Transfer to sterile infusion bag

Reserve 50 mL for final release testing (see Section 5.3.3)

Expected Expansion: 100-1,000-fold (typical yield: 10-50 × 10¹⁰ cells from 5 × 10⁸ starting cells)

### 5.3.3. CIK Cell Release Criteria

Required Tests for Lot Release (all criteria must be met):

Cell Count and Viability:

Total viable cell count ≥1 × 10¹⁰ cells

Viability ≥90% (trypan blue exclusion)

Immunophenotype (flow cytometry):

CD3⁺ T cells ≥70%

CD8⁺ T cells ≥40%

CD3⁺CD56⁺ NKT cells ≥10% (primary effector subset)

Sterility:

Bacterial culture (aerobic and anaerobic): Negative at 14 days

Fungal culture: Negative at 14 days

Note: CIK cells may be released and infused before final sterility results (14-day incubation) if Gram stain is negative and preliminary cultures (72 hours) show no growth

Endotoxin:

Limulus Amebocyte Lysate (LAL) assay <5 EU/mL

Mycoplasma:

PCR-based assay: Negative

Cytotoxicity (optional, for characterization):

⁵¹Cr-release assay against K562 targets at 40:1 E:T ratio: ≥40% specific lysis

Physical Appearance:

Pale red or colorless translucent cell suspension

Volume: 100 ± 5 mL

Expiry: CIK cells must be infused within 24 hours of harvest. If not used, cells are discarded per institutional biohazard protocols.

Product Labeling: Each CIK infusion bag is labeled with:

Patient name, medical record number, date of birth

Product: "Autologous CIK Cells"

Cell dose: "1 × 10¹⁰ viable cells in 100 mL"

Manufacturing date and expiry date/time

"For Autologous Use Only – Match Patient ID Before Infusion"

Storage: "Room Temperature (20-25°C), Do Not Refrigerate"

## 5.4. Treatment Administration and Monitoring

### 5.4.1. Camrelizumab Infusion Procedure

Pre-medication (optional, at investigator discretion):

Acetaminophen 500-1,000 mg PO 30-60 minutes before infusion

Diphenhydramine 25-50 mg PO or IV 30 minutes before infusion (for patients with prior infusion reactions)

Administration:

Verify patient identity using two identifiers

Confirm no contraindications (e.g., active infection, allergic reaction history)

Establish IV access (peripheral or central line)

Baseline vital signs (BP, HR, RR, temperature, SpO₂)

Infuse camrelizumab 200 mg in 100 mL NS over 30 minutes

Monitor vital signs every 10-15 minutes during infusion

Post-infusion vital signs at 30 and 60 minutes

Observe patient for ≥1 hour after first infusion; may reduce to 30 minutes for subsequent infusions if no reactions

Management of Infusion Reactions:

Grade 1-2: Slow or pause infusion; administer antihistamines, acetaminophen; resume at 50% rate if symptoms resolve

Grade 3-4: Permanently discontinue camrelizumab; treat per anaphylaxis protocol (epinephrine, corticosteroids, airway management)

### 5.4.2. CIK Cell Infusion Procedure

Pre-medication: None required (CIK cells are autologous and well-tolerated)

Administration:

Verify patient identity using two identifiers

Confirm CIK product label matches patient ID (critical safety check)

Review CIK lot release certification (signed by laboratory director)

Baseline vital signs

Infuse CIK cells over 30-60 minutes via gravity or infusion pump (slow rate)

Do not use leukocyte-reduction filters (will trap CIK cells)

Monitor vital signs every 15 minutes during infusion

Post-infusion vital signs at 30, 60, and 120 minutes

Observe patient for ≥2 hours after first infusion

Expected Reactions (usually mild):

Low-grade fever (≤38.5°C): Common (~30-50%), self-limited

Chills/rigors: Treat with meperidine 25-50 mg IV or warming blanket

Mild dyspnea: Usually resolves spontaneously; provide supplemental O₂ if SpO₂ <92%

Serious Reactions (rare):

Anaphylaxis: Treat per institutional protocol

Severe respiratory distress: Discontinue infusion, provide respiratory support, rule out pulmonary embolism

## 5.5. Dose Modifications and Treatment Delays

### 5.5.1. Camrelizumab Dose Modifications

General Principle: Camrelizumab is not dose-reduced. Treatment is either continued at full dose, temporarily held, or permanently discontinued based on toxicity severity.

Treatment Delays (hold next dose until recovery):

| **TOXICITY** | **GRADE** | **MANAGEMENT** | **RESUME WHEN** | **DISCONTINUE IF** |
| --- | --- | --- | --- | --- |
| Diarrhea/Colitis | 2-3 | Hold treatment; corticosteroids (prednisone 1-2 mg/kg/day) | Resolves to ≤Grade 1 | Not resolved within 8 weeks OR cannot taper steroids to ≤10 mg/day within 8 weeks |
|  | 4 | Permanently discontinue | N/A | N/A |
| Hepatotoxicity (ALT/AST/Bilirubin) | 2 | Hold treatment | Resolves to ≤Grade 1 | Not resolved within 8 weeks |
|  | 3-4 | Permanently discontinue | N/A | N/A |
| Pneumonitis | 2 | Hold treatment; corticosteroids (prednisone 1 mg/kg/day) | Resolves to ≤Grade 1 | Not resolved within 8 weeks OR recurrence |
|  | 3-4 | Permanently discontinue | N/A | N/A |
| Nephritis/Renal dysfunction | 2 | Hold treatment; corticosteroids if confirmed immune-mediated | Creatinine returns to baseline | Not resolved within 8 weeks |
|  | 3-4 | Permanently discontinue | N/A | N/A |
| Endocrinopathies |  |  |  |  |
| - Hypophysitis | 2-4 | Hold treatment; corticosteroids (prednisone 1-2 mg/kg/day) | Resume if stable on hormone replacement | Cannot taper steroids to ≤10 mg/day within 8 weeks |
| - Hyperthyroidism | 3-4 | Hold treatment; beta-blockers, thionamides | Resolves to ≤Grade 2 | Thyroid storm (Grade 4) |
| - Hypothyroidism | Any | Continue treatment; initiate levothyroxine replacement | N/A | N/A |
| - Hyperglycemia/DM | 3-4 | Hold treatment; insulin therapy | Glucose control achieved | N/A (may resume if stable) |
| Infusion Reaction | 3-4 | Permanently discontinue | N/A | N/A |
| Other immune-related AEs | 3 | Hold treatment; corticosteroids | Resolves to ≤Grade 1 | Not resolved within 8 weeks OR cannot taper steroids |
|  | 4 | Permanently discontinue | N/A | N/A |

Corticosteroid Tapering: When camrelizumab is held for immune-related AEs and corticosteroids are initiated, taper corticosteroids over ≥4 weeks once AE improves to ≤Grade 1. If AE worsens during taper, increase steroid dose and consider additional immunosuppression (e.g., infliximab for colitis, mycophenolate for hepatitis).

Maximum Treatment Delay: If toxicity does not resolve within 8 weeks of last camrelizumab dose, permanently discontinue treatment.

### 5.5.2. CIK Cell Dose Modifications

General Principle: CIK cell infusions are typically well-tolerated. Dose modifications are rarely required.

Hold CIK Infusion If:

Active systemic infection (Grade ≥3)

ECOG performance status ≥3

Uncontrolled autoimmune flare

Grade ≥3 immune-related AE from camrelizumab

Resume CIK Infusion When:

Infection resolved (afebrile for 48 hours, completed antibiotic course)

ECOG PS improves to ≤2

Immune-related AE resolves to ≤Grade 1

Permanent Discontinuation of CIK Cells:

Severe allergic reaction to CIK infusion (Grade 3-4)

Patient develops graft-versus-host disease-like syndrome (rare with autologous cells)

Patient withdrawal of consent

Clinical deterioration precluding leukapheresis

Note: If CIK cells are discontinued but patient tolerates camrelizumab, camrelizumab monotherapy may continue per investigator discretion.

# SECTION 6: STUDY PROCEDURES AND ASSESSMENTS

## 6.1. Study Schedule of Assessments

The following table summarizes the timing of all study procedures. Detailed descriptions of each assessment follow in subsequent sections.

Table: Schedule of Events

| **PROCEDURE/ASSESSMENT** | **SCREENING (DAYS -30 TO -1)** | **CYCLE 1 DAY 1** | **EACH CYCLE DAY 1** | **EVERY 2 CYCLES (Q6 WEEKS)** | **END OF TREATMENT (WITHIN 30 DAYS)** | **FOLLOW-UP (Q8 WEEKS)** |
| --- | --- | --- | --- | --- | --- | --- |
| **Administrative** |  |  |  |  |  |  |
| Informed consent | X |  |  |  |  |  |
| Inclusion/exclusion criteria | X |  |  |  |  |  |
| Medical history | X |  |  |  |  |  |
| Randomization | X |  |  |  |  |  |
| Demographics | X |  |  |  |  |  |
| **Efficacy** |  |  |  |  |  |  |
| ECOG performance status | X | X | X |  | X |  |
| Tumor assessment (CT/MRI) | X |  |  | X | X |  |
| Quality of life (EORTC QLQ-C30) | X | X | X |  | X |  |
| **Safety** |  |  |  |  |  |  |
| Physical examination | X | X |  |  | X | As indicated |
| Vital signs | X | X | X |  | X |  |
| Height, weight, BSA | X | X |  |  | X |  |
| Adverse events |  | X | X | X | X | X (SAEs only) |
| Concomitant medications | X | Continuous recording throughout study |  |  |  |  |
| **Laboratory Tests** |  |  |  |  |  |  |
| Hematology | X | X | X |  | X |  |
| Serum chemistry | X | X | X |  | X |  |
| Urinalysis | X | X | X |  | X |  |
| Thyroid function (TSH, FT3, FT4) | X | X | X |  | X |  |
| Cortisol | X | X | X |  | X |  |
| Pregnancy test (females) | X |  | As clinically indicated |  |  |  |
| Serology (HIV, HBV, HCV, syphilis) | X |  |  |  |  |  |
| Electrocardiogram (ECG) | X | X | X |  | X |  |
| **Biomarker Studies** |  |  |  |  |  |  |
| PBMC immunophenotyping | X |  | X (pre-infusion) |  |  |  |
| Serum cytokines | X |  | X (pre-infusion) |  |  |  |
| CIK cell characterization |  |  | X (Arm B only) |  |  |  |
| **Treatment Administration** |  |  |  |  |  |  |
| Camrelizumab 200 mg IV |  | X (D1) | X (D1) |  |  |  |
| Leukapheresis (Arm B only) |  | X (D-14 to -10) | X (D7-10 of prior cycle) |  |  |  |
| CIK cell infusion (Arm B only) |  | X (D14) | X (D14) |  |  |  |

## 6.2. Screening Period (Days -30 to -1)

Objectives: Confirm eligibility, obtain informed consent, collect baseline data

Procedures:

Informed Consent: Discuss study rationale, procedures, risks/benefits; provide adequate time for questions; obtain written consent before any study-specific procedures

Demographics and Medical History:

Age, sex, race/ethnicity

RCC diagnosis date, histology, stage at diagnosis

Prior systemic therapies (regimen, start/stop dates, best response, reason for discontinuation)

Prior surgeries (nephrectomy, metastasectomy), radiotherapy

Relevant medical history (cardiovascular, pulmonary, autoimmune, infectious diseases)

Physical Examination:

Height, weight, body surface area (BSA, Mosteller formula)

Vital signs: Blood pressure, heart rate, respiratory rate, temperature, oxygen saturation

ECOG performance status

Comprehensive physical exam by organ system

Laboratory Assessments (within 14 days of randomization):

Hematology: CBC with differential

Chemistry: Comprehensive metabolic panel, LDH, cortisol

Thyroid function: TSH, free T3, free T4

Urinalysis: Dipstick and microscopy; 24-hour urine protein if dipstick ≥2+

Serology: HIV antibody, HBsAg, anti-HBc, anti-HBs, anti-HCV, syphilis antibody

Pregnancy test: Serum β-hCG for women of childbearing potential

Coagulation: PT, aPTT, fibrinogen (if history of bleeding/clotting disorder)

Cardiac Assessment:

12-lead electrocardiogram (ECG)

Echocardiogram or MUGA scan if history of cardiac disease (optional)

Tumor Assessment (within 30 days of randomization):

CT chest/abdomen/pelvis with IV contrast (or MRI if contrast contraindicated)

Brain MRI with gadolinium (if clinically indicated or history of CNS metastases)

Bone scan (if bone metastases suspected or known)

Measurements of all target and non-target lesions per RECIST 1.1

Histopathology Confirmation:

Central review of pathology report confirming clear cell RCC histology

Archival tumor tissue block or 10 unstained slides (if available) for correlative studies

Quality of Life: EORTC QLQ-C30 questionnaire

Eligibility Verification: Review all inclusion/exclusion criteria; document in source and CRF

Randomization: Once eligibility confirmed, randomize patient via central web-based system

## 6.3. Treatment Period

### 6.3.1. Cycle 1, Day 1 (First Treatment)

Pre-treatment Assessments (within 24 hours before first dose):

Physical exam (targeted to symptoms)

Vital signs, weight

ECOG PS

Laboratory tests: Hematology, chemistry, thyroid function, cortisol, urinalysis

ECG

Quality of life (EORTC QLQ-C30)

Concomitant medications review

Adverse event assessment (baseline toxicities from prior therapy)

Treatment Administration:

Both Arms: Camrelizumab 200 mg IV on Day 1

Arm B only: Schedule leukapheresis for Day -14 to Day -10 before Cycle 1 to manufacture CIK cells for Day 14 infusion

Biomarker Collection (Cycle 1 Day 1, pre-infusion):

Peripheral blood (30 mL in sodium heparin tubes):

10 mL for PBMC isolation and immunophenotyping

10 mL for serum cytokine analysis

10 mL archived for future correlative studies

### 6.3.2. Cycle 1, Day 14 (CIK Cell Infusion, Arm B Only)

Vital signs before and after infusion

CIK cell infusion: 1 × 10¹⁰ cells IV

Monitor for infusion reactions

Adverse event assessment

CIK Cell Product Documentation:

Lot number, manufacturing date, cell dose, viability

Release testing results (sterility pending, endotoxin, immunophenotype)

### 6.3.3. Subsequent Cycles (Day 1 of Each 21-Day Cycle)

Pre-treatment Assessments:

Interval history, symptom assessment

Physical exam (targeted)

Vital signs, weight

ECOG PS

Laboratory tests: Hematology, chemistry, thyroid function, cortisol, urinalysis

ECG

Quality of life (EORTC QLQ-C30)

Concomitant medications and AE review

Treatment:

Camrelizumab 200 mg IV Day 1

Arm B: Leukapheresis Day 7-10 for next cycle's CIK cells; CIK infusion Day 14

Biomarker Collection (Day 1, pre-infusion):

Peripheral blood (30 mL) as per Cycle 1

### 6.3.4. Tumor Response Assessment (Every 6 Weeks)

Imaging: CT chest/abdomen/pelvis (same modality as baseline)

Schedule: Week 6, 12, 18, 24, then every 12 weeks until progression

Interpretation: Independent radiologist blinded to treatment arm; RECIST 1.1 criteria

Confirmation of Response: CR or PR must be confirmed by repeat scan ≥4 weeks later

Pseudoprogression: If initial PD but patient clinically stable, may continue treatment with confirmatory scan in 4-6 weeks

## 6.4. End-of-Treatment Visit (Within 30 Days of Last Dose)

Objectives: Final safety and efficacy assessment

Procedures:

Physical examination

Vital signs, weight

ECOG PS

Laboratory tests: Hematology, chemistry, thyroid function, cortisol, urinalysis

ECG

Tumor assessment (CT/MRI) if not done within prior 6 weeks

Quality of life (EORTC QLQ-C30)

Adverse event assessment (continue AE monitoring until resolution or 90 days, whichever is earlier)

Document reason for treatment discontinuation

Document subsequent anticancer therapy plans

## 6.5. Long-term Follow-up Period (After Treatment Discontinuation)

Objectives: Assess survival, disease status, subsequent therapies

Schedule: Every 8 weeks (± 7 days) until death, withdrawal of consent, or 1 year after last patient enrolled

Procedures (by phone or clinic visit):

Survival status

Date and cause of death (if applicable)

Disease status (progression, stable, response)

Subsequent anticancer therapies (regimen, start date)

Serious adverse events potentially related to study treatment

Tumor Assessments During Follow-up:

Not mandatory per protocol, but imaging performed per standard care may be recorded

Progression date documented if identified during follow-up

# SECTION 7: EFFICACY EVALUATION

## 7.1. Tumor Response Assessment (RECIST 1.1)

### 7.1.1. General Principles

Tumor response is assessed using Response Evaluation Criteria in Solid Tumors version 1.1 (RECIST 1.1).

Key principles:

Measurable lesions: Accurately measured in at least one dimension with longest diameter ≥10 mm by CT/MRI (≥15 mm for malignant lymph nodes measured in short axis)

Target lesions: Up to 5 lesions total (maximum 2 per organ), representing all involved organs, selected based on size and suitability for reproducible measurement

Non-target lesions: All other lesions (or sites of disease) including lesions <10 mm, bone lesions, leptomeningeal disease, ascites, pleural/pericardial effusion, lymphangitic carcinomatosis

New lesions: Any lesion not present at baseline (identified on follow-up scans)

Imaging Modality:

Same modality used throughout (CT preferred; MRI if CT contraindicated)

Contrast-enhanced CT chest/abdomen/pelvis at baseline and all follow-ups

Slice thickness ≤5 mm for target lesions

Timing:

Baseline: Within 30 days before randomization

On-treatment: Every 6 weeks (± 5 days) from randomization

End-of-treatment: If not scanned within 6 weeks prior

Follow-up: Per standard care (not protocol-mandated)

### 7.1.2. Response Definitions (RECIST 1.1)

Complete Response (CR): Disappearance of all target lesions. Any pathological lymph nodes (target or non-target) must have reduction in short axis to <10 mm.

Partial Response (PR): At least 30% decrease in sum of diameters of target lesions, taking as reference the baseline sum diameters.

Progressive Disease (PD): At least 20% increase in sum of diameters of target lesions, taking as reference the smallest sum on study (nadir). In addition to the relative 20% increase, the sum must also demonstrate an absolute increase of ≥5 mm. OR appearance of one or more new lesions. OR unequivocal progression of non-target lesions.

Stable Disease (SD): Neither sufficient shrinkage to qualify for PR nor sufficient increase to qualify for PD, taking as reference the smallest sum diameters on study.

Confirmation of Response:

CR and PR must be confirmed by repeat scan ≥4 weeks after first documentation

PD and SD do not require confirmation

Best Overall Response: Best response recorded from start of treatment until disease progression or recurrence (taking as reference for PD the smallest measurements recorded since treatment started).

## 7.2. Progression-Free Survival (PFS) – Primary Endpoint

Definition: Time from date of randomization to first documented disease progression per RECIST 1.1 (as assessed by independent blinded radiologists) or death from any cause, whichever occurs first.

Censoring Rules:

Patients alive without progression at data cutoff: Censored at date of last adequate tumor assessment

Patients starting new anticancer therapy without prior documented progression: Censored at last tumor assessment before new therapy

Patients lost to follow-up: Censored at last known alive date with adequate tumor assessment

Patients with progression determination based solely on clinical deterioration (no imaging): Not censored; progression date = date of clinical deterioration documentation

Adequate Tumor Assessment: CT/MRI performed within protocol-specified window (±5 days) with complete evaluation of all target lesions.

## 7.3. Overall Survival (OS) – Secondary Endpoint

Definition: Time from date of randomization to date of death from any cause.

Censoring: Patients alive at data cutoff are censored at last known alive date (verified by contact with patient, family, or medical records).

Follow-up for OS: Continues beyond disease progression and treatment discontinuation via phone calls or medical record review every 8 weeks until death, withdrawal of consent, or 1 year after last patient enrollment.

## 7.4. Objective Response Rate (ORR) – Secondary Endpoint

Definition: Proportion of patients who achieve best overall response of CR or PR per RECIST 1.1, confirmed by repeat imaging ≥4 weeks later.

Analysis Population: Intention-to-treat (ITT) and evaluable-for-efficacy (EE) populations.

Non-responders: Patients with SD, PD, or unevaluable response are classified as non-responders.

## 7.5. Disease Control Rate (DCR) – Secondary Endpoint

Definition: Proportion of patients achieving CR, PR, or SD lasting ≥6 weeks.

Rationale: Captures clinical benefit in patients whose tumors stabilize but do not shrink substantially.

## 7.6. Duration of Response (DOR) – Secondary Endpoint

Definition (for responders only): Time from first documented CR or PR (whichever is recorded first) to first documented progression or death from any cause.

Censoring: Patients without progression or death at data cutoff are censored at last adequate tumor assessment.

# SECTION 8: SAFETY EVALUATION

## 8.1. Adverse Event Definitions and Classification

### 8.1.1. Adverse Event (AE)

Definition (ICH-GCP E2A): Any untoward medical occurrence in a patient administered a pharmaceutical product, which does not necessarily have a causal relationship with the treatment. An AE can be:

Any unfavorable and unintended sign (including abnormal laboratory finding)

Symptom

Disease temporally associated with use of investigational product, whether or not considered related

AE Reporting Period: From informed consent signature until 90 days after last study drug dose (or longer if AE is ongoing or considered treatment-related).

Severity Grading: National Cancer Institute Common Terminology Criteria for Adverse Events version 4.0 (NCI-CTCAE v4.0).

### 8.1.2. Serious Adverse Event (SAE)

Definition (ICH-GCP E2A): An AE occurring at any dose that:

Results in death

Is life-threatening (patient at immediate risk of death at time of event)

Requires inpatient hospitalization or prolongation of existing hospitalization

Results in persistent or significant disability/incapacity

Is a congenital anomaly/birth defect

Is a medically important event (based on medical judgment, may jeopardize patient or require intervention to prevent one of the above outcomes)

Exclusions from SAE Reporting:

Hospitalizations for protocol-specified procedures (e.g., scheduled leukapheresis, elective surgeries planned before study entry)

Hospitalizations for disease progression (unless complicated by other AE)

SAE Reporting Timeline: Within 24 hours of investigator awareness to sponsor and ethics committee.

## 8.2. Management of Immune-Related Adverse Events (irAEs)

Given the mechanism of PD-1 inhibition, immune-related toxicities require specific management algorithms.

### 8.2.1. General Principles

Early Recognition: High index of suspicion; irAEs can occur at any time (even after treatment discontinuation)

Differential Diagnosis: Rule out infection, malignancy, metabolic causes before attributing to immunotherapy

Corticosteroids: Mainstay of treatment for Grade ≥2 irAEs (prednisone 0.5-2 mg/kg/day or equivalent)

Specialist Consultation: Involve appropriate subspecialists as needed

Treatment Interruption: Hold camrelizumab for Grade ≥2 irAEs until resolution to Grade ≤1

Permanent Discontinuation: For Grade 4 or recurrent Grade 3 irAEs of same type

### 8.2.2. Immune-Related Pneumonitis

Presentation: Dyspnea, cough, chest pain, hypoxia; CT findings (ground-glass opacities, organizing pneumonia pattern)

Workup: Chest CT, pulse oximetry, pulmonary function tests; bronchoscopy with BAL if diagnosis uncertain (rule out infection, malignancy, heart failure)

Management:

Grade 1 (asymptomatic): Continue camrelizumab; monitor closely with repeat CT in 3-4 weeks

Grade 2 (symptomatic, not interfering with ADLs): Hold camrelizumab; prednisone 0.5-1 mg/kg/day PO × 4-6 weeks with slow taper; antibiotics if superinfection suspected; resume camrelizumab when resolves to Grade ≤1

Grade 3-4 (severe dyspnea, hypoxia, life-threatening): Permanently discontinue camrelizumab; methylprednisolone 2-4 mg/kg/day IV → oral taper over 6-8 weeks; consider infliximab 5 mg/kg IV or mycophenolate mofetil 1 g BID if no improvement in 48 hours; ICU admission if respiratory failure

### 8.2.3. Immune-Related Colitis/Diarrhea

Presentation: Diarrhea (≥4 stools/day above baseline), abdominal pain, blood/mucus in stool

Workup: Stool studies (C. difficile, bacterial culture, ova/parasites, CMV PCR if immunosuppressed); colonoscopy with biopsy if Grade ≥3 or not responsive to therapy

Management:

Grade 1 (<4 stools/day increase): Continue camrelizumab; dietary modification, loperamide PRN

Grade 2 (4-6 stools/day, mild cramping): Hold camrelizumab; prednisone 0.5-1 mg/kg/day; budesonide 9 mg/day if only right colon involved; resume camrelizumab when resolves to Grade ≤1

Grade 3 (≥7 stools/day, severe cramping, blood in stool): Hold camrelizumab; methylprednisolone 1-2 mg/kg/day IV; colonoscopy; if no improvement in 3-5 days: infliximab 5 mg/kg IV (contraindicated if intestinal perforation suspected); if resolves: may attempt to resume camrelizumab after prolonged taper; if recurs: permanently discontinue

Grade 4 (life-threatening, perforation, toxic megacolon): Permanently discontinue camrelizumab; methylprednisolone 2 mg/kg/day IV; surgical consultation; ICU monitoring

### 8.2.4. Immune-Related Hepatitis

Presentation: Asymptomatic AST/ALT elevation; jaundice, RUQ pain (severe cases)

Workup: Hepatitis serologies (HBV, HCV, HAV, EBV, CMV), autoimmune markers (ANA, anti-smooth muscle, anti-LKM), ultrasound/MRI liver (rule out biliary obstruction, metastases), liver biopsy if diagnosis uncertain

Management:

Grade 1 (AST/ALT 1-3× ULN): Continue camrelizumab; monitor LFTs weekly

Grade 2 (AST/ALT 3-5× ULN or bilirubin 1.5-3× ULN): Hold camrelizumab; prednisone 0.5-1 mg/kg/day; hepatology consultation; check LFTs every 3-5 days; resume camrelizumab when resolves to Grade ≤1

Grade 3-4 (AST/ALT >5× ULN or bilirubin >3× ULN): Permanently discontinue camrelizumab; methylprednisolone 1-2 mg/kg/day IV; if no improvement in 3-5 days: mycophenolate mofetil 1 g BID; liver transplant evaluation if fulminant hepatic failure

# SECTION 9: STATISTICAL CONSIDERATIONS

## 9.1. Sample Size Calculation

Rationale: At the time of protocol development (2018), based on published literature and institutional retrospective data:

Control arm (camrelizumab monotherapy): Expected median PFS = 4.5 months

Experimental arm (camrelizumab + CIK): Expected median PFS = 11-14 months

Assumptions:

Hazard ratio (HR) = 0.35-0.41 (corresponding to PFS improvement from 4.5 to 11-14 months)

Two-sided log-rank test, α = 0.05

Power (1-β) = 80%

Accrual period = 24 months

Follow-up period = 12 months after last patient enrollment

Dropout rate = 10%

Sample Size Calculation (using PASS software):

Required events (disease progression or death) = 50-60

Estimated sample size = 60-90 patients (30-45 per arm)

Actual Enrollment: 21 patients (12 control, 9 experimental) due to premature termination.

## 9.2. Analysis Populations

### 9.2.1. Intention-to-Treat (ITT) Population

Definition: All randomized patients, regardless of whether they received study treatment, analyzed according to randomized treatment assignment.

Use: Primary analysis population for all efficacy endpoints (PFS, OS, ORR, DCR).

Actual ITT Population: 21 patients (12 control arm, 9 experimental arm).

### 9.2.2. Modified ITT (mITT) Population

Definition: All randomized patients who received at least one dose of study treatment (camrelizumab ± CIK cells).

Use: Sensitivity analysis for efficacy endpoints.

Actual mITT Population: 21 patients (same as ITT; all randomized patients received treatment).

### 9.2.3. Evaluable-for-Efficacy (EE) Population

Definition: All patients in mITT who:

Received at least 2 cycles of treatment, OR

Discontinued before 2 cycles due to disease progression or death

Use: Supportive analysis for tumor response endpoints (ORR, DCR).

### 9.2.4. Safety Population

Definition: All patients who received at least one dose of any study treatment (camrelizumab or CIK cells).

Use: Primary population for all safety analyses (AEs, laboratory abnormalities, vital signs).

Actual Safety Population: 21 patients (12 control arm, 9 experimental arm).

## 9.3. Statistical Methods for Efficacy

### 9.3.1. Primary Endpoint: Progression-Free Survival (PFS)

Analysis Method:

Kaplan-Meier method to estimate PFS curves for each treatment arm

Log-rank test to compare PFS between arms (two-sided, α=0.05)

Hazard ratio (HR) and 95% confidence interval (CI) estimated using Cox proportional hazards regression (unadjusted)

Median PFS and 95% CI reported for each arm

Censoring: As described in Section 7.2.

Sensitivity Analyses:

Per-protocol analysis (excluding major protocol deviations)

Analysis censoring patients at start of subsequent anticancer therapy

Subgroup Analyses (exploratory, given small sample size):

ECOG PS (0 vs 1)

Prior therapy type (IFN-α vs TKI)

Number of prior therapies (1 vs ≥2)

Baseline tumor burden

### 9.3.2. Secondary Endpoint: Overall Survival (OS)

Analysis Method: Same as PFS (Kaplan-Meier, log-rank test, Cox regression).

Censoring: As described in Section 7.3.

### 9.3.3. Secondary Endpoint: Objective Response Rate (ORR)

Analysis Method:

Proportion of patients achieving CR or PR (RECIST 1.1, confirmed)

Exact 95% CI calculated using Clopper-Pearson method

Between-arm comparison using Fisher's exact test (two-sided, α=0.05)

Odds ratio and 95% CI calculated using logistic regression

Handling of Non-Evaluable Patients: Patients without post-baseline tumor assessment are classified as non-responders in primary analysis; sensitivity analysis excluding non-evaluable patients.

### 9.3.4. Secondary Endpoint: Disease Control Rate (DCR)

Analysis Method: Same as ORR (proportion with 95% CI, Fisher's exact test).

### 9.3.5. Secondary Endpoint: Duration of Response (DOR)

Analysis Method: Kaplan-Meier method among responders only; median DOR and 95% CI reported.

### 9.3.6. Secondary Endpoint: Quality of Life (EORTC QLQ-C30)

Analysis Method:

Scoring per EORTC QLQ-C30 manual (version 3.0)

Global Health Status (GHS) score (range 0-100, higher = better)

Change from baseline to end-of-treatment analyzed using:

Mixed-effects repeated measures model (MMRM) with treatment, time, treatment-by-time interaction as fixed effects; baseline score as covariate

Between-arm comparison of least-squares mean change at end-of-treatment

Handling of Missing Data: MMRM uses all available data without imputation; sensitivity analysis using last-observation-carried-forward (LOCF).

## 9.4. Statistical Methods for Safety

Adverse Events:

Frequency and percentage of patients experiencing:

Any AE

Grade ≥3 AE

Treatment-related AE

SAE

AE leading to treatment discontinuation

AE leading to death

AEs summarized by system organ class (SOC) and preferred term (PT) using MedDRA version 24.0

Between-arm comparison using Fisher's exact test (exploratory given small sample)

Laboratory Abnormalities:

Shift tables showing change from baseline (normal, low, high) to worst on-treatment grade (NCI-CTCAE v4.0)

Summary statistics (mean, median, SD, range) for continuous lab parameters at each timepoint

Vital Signs and ECG: Summary statistics at baseline and each assessment; frequency of clinically significant changes.

## 9.5. Interim Analysis

Original Plan: One interim analysis planned when 50% of patients completed 6 months follow-up.

Actual Implementation: Not performed due to slow accrual and premature termination.

## 9.6. Multiplicity Adjustment

None planned. Given the exploratory phase II nature and small sample size, no formal adjustment for multiple comparisons. All p-values are descriptive and hypothesis-generating.

## 9.7. Missing Data

Efficacy: Missing tumor assessments handled by censoring rules (Section 7.2). Sensitivity analyses using different censoring assumptions.

Safety: All available AE data included; no imputation for missing AE severity or causality (investigator judgment sought).

Quality of Life: MMRM approach uses all available data without imputation; supplemented by LOCF sensitivity analysis.

## 9.8. Software

Statistical analyses performed using:

SPSS version 26.0 (IBM Corporation, Armonk, NY, USA)

R version 4.2.0 (R Foundation for Statistical Computing, Vienna, Austria)

Packages: survival, survminer, ggplot2, epiR

# SECTION 10: ETHICAL AND REGULATORY CONSIDERATIONS

## 10.1. Ethical Conduct of the Study

This study was conducted in accordance with:

Declaration of Helsinki (2013 revision)

International Council for Harmonisation (ICH) Good Clinical Practice (GCP) Guidelines (E6-R2)

China GCP Regulations (NMPA Order No. 3, 2020 revision)

Ethical Guidelines for Biomedical Research Involving Human Subjects (CIOMS 2016)

Applicable national and local laws and regulations

Ethical Principles:

Respect for Persons: Voluntary informed consent; right to withdraw without penalty

Beneficence: Favorable risk-benefit ratio; minimize risks, maximize benefits

Justice: Fair patient selection; equitable distribution of research burdens and benefits

## 10.2. Institutional Review Board / Ethics Committee

Approval:

Ethics Committee of Tianjin Medical University Cancer Hospital and Institute

Approval Number: E2017232

Initial Approval Date: 24 November 2017

Annual Renewal: Approved annually

Documents Submitted for EC Review:

Protocol version 1.0

Informed consent form (Chinese version)

Investigator brochure for camrelizumab

CIK cell manufacturing protocol

Principal investigator CV and qualifications

Laboratory certifications

Ongoing Reporting to EC:

Serious adverse events: Within 7 days

Protocol deviations: Within 15 days

Annual progress reports

Study termination report

## 10.3. Regulatory Approval

National Medical Products Administration (NMPA) Registration:

Drug Approval Number: S20190027 (camrelizumab)

IIT Classification: Investigator-initiated trial using approved drug in exploratory indication

NMPA Notification: Study filed with NMPA Center for Drug Evaluation

ClinicalTrials.gov Registration:

NCT Number: NCT03987698

Registration Date: 17 June 2019

## 10.4. Informed Consent Process

Pre-Consent Discussion:

Discuss study rationale, procedures, risks/benefits in non-technical language

Review written informed consent form section-by-section

Emphasize voluntariness and right to withdraw

Allow adequate time for questions

Key Information Disclosed:

Study purpose and randomization process

Study procedures (leukapheresis, IV infusions, tumor assessments, blood draws)

Risks, benefits, and alternatives

Confidentiality protections

Contact information for questions

Consent Documentation:

Patient (or legal representative) signs and dates ICF

Investigator or designee signs and dates ICF

Patient receives copy of signed ICF

Original ICF filed in regulatory binder

## 10.5. Confidentiality and Data Protection

Personal Data Handling:

Patient identifiers stored separately from research data

Research data coded with unique patient study ID

Key linking identifiers to study IDs secured

Access Controls:

Research data accessible only to authorized study personnel

Electronic data stored on password-protected, encrypted computers

Case report forms stored in locked cabinets

Data Retention:

Study documents retained for 15 years after study completion

Electronic data archived with regular backups

Publication and Dissemination:

Published manuscripts use aggregate data only; no individual patient identification

# SECTION 11: DATA MANAGEMENT AND QUALITY ASSURANCE

## 11.1. Case Report Forms (CRFs)

**CRF Design**:

- Paper-based and electronic CRFs (eCRF using REDCap)
- Modules: Screening, Demographics, Medical History, Treatment, Adverse Events, etc.

**CRF Completion**:

- Within 7 days of patient visit
- All entries verifiable against source documents
- Corrections by single line-through, initialing and dating

**eCRF Features**:

- Real-time data entry with automated consistency checks
- Audit trail logging all data entry and modifications
- Electronic signatures for investigator approval
- Query generation for missing/inconsistent data

## 11.2. Source Documents

**Definition**: Original records documenting patient's clinical information (hospital medical records, laboratory reports, imaging reports, informed consent forms).

**Source Data Verification**:

- Monitor verifies CRF entries against source documents during site visits
- 100% verification for key data (informed consent, eligibility, primary endpoint, SAEs)

## 11.3. Data Quality Control

**Central Data Review**:

- Data manager reviews eCRFs weekly for completeness and consistency
- Automated validation checks flag implausible values
- Medical monitor reviews AE and laboratory data

**Query Resolution**:

- Electronic queries issued via REDCap system
- Investigator responds within 14 days
- Query closure requires monitor approval

**Database Lock**:

- Planned after all patients complete 12-month follow-up
- Database lock committee (PI, medical monitor, statistician) reviews data completeness
- After lock, no further data changes without formal unlock request

## 11.4. Study Monitoring

**Monitoring Plan**:

- **Site Initiation Visit** (March 2019)
- **Routine Monitoring Visits**: Monthly during enrollment, quarterly during follow-up
- **Close-Out Visit** (June 2020)

**Monitoring Activities**:

- Verify informed consent process
- Confirm eligibility criteria met
- Verify treatment administration
- Review SAE reporting timeliness
- Assess protocol compliance

## 11.5. Audits and Regulatory Inspections

**Sponsor Audits**: Quality assurance audits planned but not performed (study terminated early)

**Regulatory Inspections**: NMPA inspection rights per Chinese GCP regulations; no inspections conducted

## 11.6. Record Retention

**Essential Documents Retained**:

- Protocol, amendments, ICFs, EC approvals
- Patient source documents
- CRFs (electronic backups)
- Investigational product records
- SAE reports, monitoring reports

**Retention Period**: 15 years after study completion

**Archiving Location**: On-site locked archive room; off-site electronic backup

# SECTION 12: STUDY ADMINISTRATION

## 12.1. Protocol Amendments

**None**: This protocol (Version 1.0, dated 29 October 2018) was not amended during the study.

**Procedure if Amendment Needed**:

1. Sponsor prepares amendment with rationale
2. Submit to EC for approval
3. Submit to NMPA per IIT regulations
4. Update ClinicalTrials.gov registration
5. Re-consent patients if amendment affects risk-benefit

**Protocol Deviations**: Minor deviations documented in CRF; major deviations reported to EC within 15 days

## 12.2. Study Termination

**Early Termination Decision**:

- Date: May 2020
- Reason: Combination of:
  1. COVID-19 pandemic disruption
  2. Approval of camrelizumab + axitinib as first-line SOC (November 2019)
  3. Recruitment challenges: Accrual rate <1 patient/month

**Notifications**:

- Ethics Committee: Notified June 2020; approved study termination
- NMPA: Notification filed
- ClinicalTrials.gov: Updated with "Terminated" status

**Patient Notifications**:

- All enrolled patients informed
- Patients continuing treatment allowed to continue outside protocol
- Follow-up for survival and safety continued per protocol

## 12.3. Study Completion

**Primary Completion Date**: May 2020

**Study Completion Date**: May 2025 (estimated; final survival follow-up 60+ months)

**Final Activities**:

- Database lock and analysis (2025)
- Clinical study report preparation (2025)
- Manuscript preparation and submission (2025-2026)

## 12.4. Funding and Conflicts of Interest

**Funding Source**:

- **Investigator-Initiated Trial (IIT)**: Funded by Tianjin Medical University Cancer Hospital
- **Drug Supply**: Camrelizumab provided by Jiangsu Hengrui Medicine Co., Ltd. at no cost
- **CIK Manufacturing**: Funded by hospital

**Role of Sponsor (Investigator-Sponsor)**:

- Principal Investigator (Dr. Xiubao Ren) serves as sponsor-investigator
- Responsible for study design, conduct, data analysis, manuscript preparation

**Industry Involvement**:

- Jiangsu Hengrui Medicine Co., Ltd. provided drug supply only
- No role in study design, data collection, analysis, or manuscript preparation

**Conflict of Interest Disclosures**:

- Dr. Xiubao Ren: No conflicts of interest
- Co-investigators: No conflicts of interest

## 12.5. Publication Policy

**Authorship**: Determined per ICMJE criteria:

1. Substantial contributions to conception/design or data acquisition/analysis
2. Drafting or revising manuscript critically
3. Final approval of version to be published
4. Agreement to be accountable for all aspects of work

**Planned Publications**:

1. **Primary manuscript**: Clinical outcomes (PFS, OS, ORR, safety)
   - Target journal: Journal of Clinical Oncology, Lancet Oncology, or Clinical Cancer Research
   - Authorship: Dr. Xiubao Ren (corresponding author), co-investigators as co-authors
2. **Translational manuscript**: Immune correlative studies
   - Target journal: Oncoimmunology, Cancer Immunology Research
3. **Clinical trial registry results**: Post results to ClinicalTrials.gov within 12 months

**Data Sharing**:

- De-identified individual participant data may be shared upon reasonable request
- Requests evaluated by study team; data use agreement required

**Acknowledgments**:

- Jiangsu Hengrui Medicine Co., Ltd. for camrelizumab supply
- Cell Processing Laboratory staff for CIK cell manufacturing
- Patients and families for participation

# SECTION 13: REFERENCES

1. Chen W, Zheng R, Baade PD, Zhang S, Zeng H, Bray F, Jemal A, Yu XQ, He J. Cancer statistics in China, 2015. CA Cancer J Clin. 2016;66(2):115-132. doi:10.3322/caac.21338
2. Sternberg CN, Davis ID, Mardiak J, et al. Pazopanib in locally advanced or metastatic renal cell carcinoma: results of a randomized phase III trial. J Clin Oncol. 2010;28(6):1061-1068. doi:10.1200/JCO.2009.23.9764
3. Motzer RJ, Hutson TE, Tomczak P, et al. Sunitinib versus interferon alfa in metastatic renal-cell carcinoma. N Engl J Med. 2007;356(2):115-124. doi:10.1056/NEJMoa065044
4. Motzer RJ, Escudier B, McDermott DF, et al; CheckMate 025 Investigators. Nivolumab versus everolimus in advanced renal-cell carcinoma. N Engl J Med. 2015;373(19):1803-1813. doi:10.1056/NEJMoa1510665
5. Liu L, Zhang W, Qi X, Li H, Yu J, Wei S, Hao X, Ren X. Randomized study of autologous cytokine-induced killer cell immunotherapy in metastatic renal carcinoma. Clin Cancer Res. 2012;18(6):1751-1759. doi:10.1158/1078-0432.CCR-11-2442
6. Zhang L, Wang J, Wei F, et al. Profiling the dynamic expression of checkpoint molecules on cytokine-induced killer cells from non-small-cell lung cancer patients. Oncotarget. 2016;7(28):43604-43615. doi:10.18632/oncotarget.9871
7. Eisenhauer EA, Therasse P, Bogaerts J, et al. New response evaluation criteria in solid tumours: revised RECIST guideline (version 1.1). Eur J Cancer. 2009;45(2):228-247. doi:10.1016/j.ejca.2008.10.026
8. National Cancer Institute. Common Terminology Criteria for Adverse Events (CTCAE) Version 4.0. Published May 28, 2009. <https://evs.nci.nih.gov/ftp1/CTCAE/CTCAE_4.03/>
9. International Council for Harmonisation. ICH Harmonised Guideline: Integrated Addendum to ICH E6(R1): Guideline for Good Clinical Practice E6(R2). Published November 9, 2016. <https://database.ich.org/sites/default/files/E6_R2_Addendum.pdf>
10. World Medical Association. World Medical Association Declaration of Helsinki: ethical principles for medical research involving human subjects. JAMA. 2013;310(20):2191-2194. doi:10.1001/jama.2013.281053
11. Brahmer JR, Lacchetti C, Schneider BJ, et al. Management of immune-related adverse events in patients treated with immune checkpoint inhibitor therapy: American Society of Clinical Oncology Clinical Practice Guideline. J Clin Oncol. 2018;36(17):1714-1768. doi:10.1200/JCO.2017.77.6385
12. Haanen JBAG, Carbonnel F, Robert C, et al; ESMO Guidelines Committee. Management of toxicities from immunotherapy: ESMO Clinical Practice Guidelines. Ann Oncol. 2017;28(suppl_4):iv119-iv142. doi:10.1093/annonc/mdx225

# SECTION 14: APPENDICES

## APPENDIX A: ECOG Performance Status Scale

| **GRADE** | **DESCRIPTION** |
| --- | --- |
| **0** | Fully active, able to carry on all pre-disease performance without restriction |
| **1** | Restricted in physically strenuous activity but ambulatory and able to carry out work of a light or sedentary nature |
| **2** | Ambulatory and capable of all self-care but unable to carry out any work activities; up and about >50% of waking hours |
| **3** | Capable of only limited self-care; confined to bed or chair >50% of waking hours |
| **4** | Completely disabled; cannot carry on any self-care; totally confined to bed or chair |
| **5** | Dead |

Reference: Oken MM, Creech RH, Tormey DC, et al. Toxicity and response criteria of the Eastern Cooperative Oncology Group. Am J Clin Oncol. 1982;5(6):649-655.

## APPENDIX B: EORTC QLQ-C30 Questionnaire (Version 3.0)

**Instructions**: Please answer all questions yourself by circling the number that best applies to you. There are no "right" or "wrong" answers.

**During the past week:**

| **NO.** | **QUESTION** | **NOT AT ALL** | **A LITTLE** | **QUITE A BIT** | **VERY MUCH** |
| --- | --- | --- | --- | --- | --- |
| 1 | Do you have any trouble doing strenuous activities, like carrying a heavy shopping bag or a suitcase? | 1 | 2 | 3 | 4 |
| 2 | Do you have any trouble taking a long walk? | 1 | 2 | 3 | 4 |
| 3 | Do you have any trouble taking a short walk outside of the house? | 1 | 2 | 3 | 4 |
| 4 | Do you need to stay in bed or a chair during the day? | 1 | 2 | 3 | 4 |
| 5 | Do you need help with eating, dressing, washing yourself or using the toilet? | 1 | 2 | 3 | 4 |
|  |  |  |  |  |  |
| 6 | Were you limited in doing either your work or other daily activities? | 1 | 2 | 3 | 4 |
| 7 | Were you limited in pursuing your hobbies or other leisure time activities? | 1 | 2 | 3 | 4 |
| 8 | Were you short of breath? | 1 | 2 | 3 | 4 |
| 9 | Have you had pain? | 1 | 2 | 3 | 4 |
| 10 | Did you need to rest? | 1 | 2 | 3 | 4 |
| 11 | Have you had trouble sleeping? | 1 | 2 | 3 | 4 |
| 12 | Have you felt weak? | 1 | 2 | 3 | 4 |
| 13 | Have you lacked appetite? | 1 | 2 | 3 | 4 |
| 14 | Have you felt nauseated? | 1 | 2 | 3 | 4 |
| 15 | Have you vomited? | 1 | 2 | 3 | 4 |
|  |  |  |  |  |  |
| 16 | Have you been constipated? | 1 | 2 | 3 | 4 |
| 17 | Have you had diarrhea? | 1 | 2 | 3 | 4 |
| 18 | Were you tired? | 1 | 2 | 3 | 4 |
| 19 | Did pain interfere with your daily activities? | 1 | 2 | 3 | 4 |
| 20 | Have you had difficulty in concentrating on things, like reading a newspaper or watching television? | 1 | 2 | 3 | 4 |
| 21 | Did you feel tense? | 1 | 2 | 3 | 4 |
| 22 | Did you worry? | 1 | 2 | 3 | 4 |
| 23 | Did you feel irritable? | 1 | 2 | 3 | 4 |
| 24 | Did you feel depressed? | 1 | 2 | 3 | 4 |
| 25 | Have you had difficulty remembering things? | 1 | 2 | 3 | 4 |
|  |  |  |  |  |  |
| 26 | Has your physical condition or medical treatment interfered with your family life? | 1 | 2 | 3 | 4 |
| 27 | Has your physical condition or medical treatment interfered with your social activities? | 1 | 2 | 3 | 4 |
| 28 | Has your physical condition or medical treatment caused you financial difficulties? | 1 | 2 | 3 | 4 |

**For the following questions please circle the number between 1 and 7 that best applies to you:**

**29. How would you rate your overall health during the past week?**

| **1** | **2** | **3** | **4** | **5** | **6** | **7** |
| --- | --- | --- | --- | --- | --- | --- |
| Very poor |  |  |  |  |  | Excellent |

**30. How would you rate your overall quality of life during the past week?**

| **1** | **2** | **3** | **4** | **5** | **6** | **7** |
| --- | --- | --- | --- | --- | --- | --- |
| Very poor |  |  |  |  |  | Excellent |

**EORTC QLQ-C30 SCORING MANUAL (Version 3.0)**

**Scoring**: Per EORTC QLQ-C30 Scoring Manual v3.0; raw scores linearly transformed to 0-100 scale. Higher score on functional scales = better functioning; higher score on symptom scales = more symptoms.

Reference: Aaronson NK, Ahmedzai S, Bergman B, et al. The EORTC QLQ-C30: a quality-of-life instrument for use in international clinical trials in oncology. J Natl Cancer Inst. 1993;85(5):365-376.

## APPENDIX C: RECIST 1.1 Criteria Summary

**Target Lesion Response**

| **RESPONSE** | **CRITERIA** |
| --- | --- |
| **Complete Response (CR)** | Disappearance of all target lesions. Any pathological lymph nodes must have reduction in short axis to <10 mm. |
| **Partial Response (PR)** | At least 30% decrease in sum of diameters of target lesions. |
| **Progressive Disease (PD)** | At least 20% increase (≥5 mm absolute) in sum of diameters OR new lesions. |
| **Stable Disease (SD)** | Neither sufficient shrinkage for PR nor sufficient increase for PD. |

**Overall Response (Best Response)**

| **TARGET** | **NON-TARGET** | **NEW LESIONS** | **OVERALL RESPONSE** |
| --- | --- | --- | --- |
| CR | CR | No | CR |
| CR | Non-CR/Non-PD | No | PR |
| PR | Non-PD | No | PR |
| SD | Non-PD | No | SD |
| PD | Any | Yes or No | PD |
| Any | PD | Yes or No | PD |
| Any | Any | Yes | PD |

**Confirmation**: CR and PR require confirmation ≥4 weeks after criteria first met. PD and SD do not require confirmation.

Reference: Eisenhauer EA, et al. Eur J Cancer. 2009;45(2):228-247.

## APPENDIX D: NCI-CTCAE Version 4.0 Grading (Selected AEs)

**Hematologic Toxicities**

| **AE** | **GRADE 1** | **GRADE 2** | **GRADE 3** | **GRADE 4** |
| --- | --- | --- | --- | --- |
| **Anemia (Hgb)** | <LLN-10.0 g/dL | <10.0-8.0 g/dL | <8.0 g/dL; transfusion indicated | Life-threatening; urgent intervention |
| **Neutropenia (ANC)** | <LLN-1,500/mm³ | <1,500-1,000/mm³ | <1,000-500/mm³ | <500/mm³ |
| **Thrombocytopenia** | <LLN-75,000/mm³ | <75,000-50,000/mm³ | <50,000-25,000/mm³ | <25,000/mm³ |

**Gastrointestinal Toxicities**

| **AE** | **GRADE 1** | **GRADE 2** | **GRADE 3** | **GRADE 4** |
| --- | --- | --- | --- | --- |
| **Diarrhea** | Increase <4 stools/day | Increase 4-6 stools/day | Increase ≥7 stools/day; hospitalization | Life-threatening |
| **Nausea** | Loss of appetite | Oral intake decreased | Inadequate oral intake; TPN indicated | - |
| **Colitis** | Asymptomatic | Abdominal pain; mucus/blood | Severe abdominal pain; fever; peritoneal signs | Life-threatening |

**Hepatic Toxicities**

| **AE** | **GRADE 1** | **GRADE 2** | **GRADE 3** | **GRADE 4** |
| --- | --- | --- | --- | --- |
| **ALT/AST** | >ULN-3.0×ULN | >3.0-5.0×ULN | >5.0-20.0×ULN | >20.0×ULN |
| **Bilirubin** | >ULN-1.5×ULN | >1.5-3.0×ULN | >3.0-10.0×ULN | >10.0×ULN |

**Respiratory Toxicities**

| **AE** | **GRADE 1** | **GRADE 2** | **GRADE 3** | **GRADE 4** |
| --- | --- | --- | --- | --- |
| **Pneumonitis** | Asymptomatic; radiographic findings only | Symptomatic; medical intervention; limiting instrumental ADL | Severe symptoms; limiting self-care ADL; oxygen indicated | Life-threatening respiratory compromise |

*Abbreviations*: LLN=lower limit of normal; ULN=upper limit of normal; ADL=activities of daily living; TPN=total parenteral nutrition

Full CTCAE v4.0: <https://evs.nci.nih.gov/ftp1/CTCAE/CTCAE_4.03/>

## APPENDIX E: INFORMED CONSENT FORM

INFORMED CONSENT FOR PARTICIPATION IN CLINICAL RESEARCH

**STUDY INFORMATION**

| **ITEM** | **DETAILS** |
| --- | --- |
| **Study Title** | Camrelizumab (SHR-1210) with or without Cytokine-Induced Killer Cells for Metastatic Renal Clear Cell Carcinoma: A Multi-Center, Prospective, Randomized Controlled Clinical Trial |
| **Protocol Number** | PD1-CIK-mRCC |
| **Informed Consent Version** | Version 2.0 |
| **ICF Version Date** | 10 February 2019 |
| **Study Site** | Tianjin Medical University Cancer Institute and Hospital |
| **ClinicalTrials.gov Registration** | NCT03987698 |
| **Principal Investigator** | Xiubao Ren, M.D., Ph.D.<br>Director, Department of Biotherapy<br>Tianjin Medical University Cancer Institute & Hospital<br>Tel: +86-22-23340123-3173<br>Email: [renxiubao@tjmuch.com](mailto:renxiubao@tjmuch.com) |
| **24-Hour Emergency Contact** | [To be filled: Phone number] |

INVITATION TO PARTICIPATE

Dear Mr./Ms. _______________________,

You are being invited to participate in a clinical research study. Before you decide whether to participate, it is important that you understand why the research is being done and what it will involve. Please take time to read the following information carefully and discuss it with your family, friends, or your personal physician if you wish. Ask the study doctor or study staff if there is anything that is not clear or if you would like more information.

What is the purpose of this document?

This Informed Consent Form (ICF) is designed to provide you with information about this research study. It describes:

The purpose of the study

What you will be asked to do if you participate

Possible risks and benefits

Your rights as a research participant

Alternative treatments available to you

Please read this document carefully. Take as much time as you need to decide. You may discuss it with your family, friends, or your doctor. You may ask questions at any time.

SECTION 1: BACKGROUND AND PURPOSE OF THE STUDY

1.1 Background: Why is this research being done?

About Your Disease: Metastatic Renal Cell Carcinoma (mRCC)

Renal cell carcinoma (RCC) is the most common malignancy of the kidney and a leading cause of cancer-related deaths. In China, approximately 66,800 new cases and 23,400 deaths from kidney cancer were reported in 2015. Clear cell RCC accounts for 80-90% of all kidney cancers. While surgery is the primary treatment for localized disease, about 30% of patients experience recurrence or distant spread (metastases) within 3 years after surgery. For metastatic kidney cancer, systemic drug therapy is the main treatment approach.

Current Treatments and Their Limitations

Historically, metastatic kidney cancer has been treated with:

Immunotherapy (interferon-α, interleukin-2): Modest response rates (~10-15%) with significant side effects

Targeted therapy (sunitinib, sorafenib, pazopanib): Better response rates (~30-40%) but still associated with substantial toxicities (diarrhea, high blood pressure, hand-foot syndrome)

Immune checkpoint inhibitors (PD-1 inhibitors): Newer class of drugs showing promising results

What are PD-1 Inhibitors?

PD-1 (Programmed Death-1) is a protein on immune cells that acts as a "brake" preventing them from attacking cancer cells. PD-1 inhibitors are drugs that block this brake, allowing the immune system to recognize and attack cancer cells. Examples include nivolumab and pembrolizumab, which have been approved by the U.S. FDA for treating various cancers, including kidney cancer.

In a major clinical trial (CheckMate 025) involving 821 patients with metastatic kidney cancer who had received prior treatment, nivolumab (a PD-1 inhibitor) was compared to everolimus (a targeted therapy). Results showed:

Overall survival: 25 months (nivolumab) vs. 19.6 months (everolimus)

Response rate: 25% vs. 5%

Fewer side effects with nivolumab

Based on these results, the FDA approved PD-1 inhibitors for metastatic kidney cancer in October 2015.

What are CIK Cells?

Cytokine-Induced Killer (CIK) cells are immune cells grown in the laboratory from your own blood. These cells are specially trained to recognize and kill cancer cells. The process involves:

Collection of your white blood cells through a procedure called leukapheresis

Expansion and activation of these cells in the laboratory over 14 days using special growth factors

Reinfusion of the activated cells back into your body to fight cancer

Previous research from our institution showed that CIK cell therapy significantly prolonged survival in patients with metastatic kidney cancer compared to standard immunotherapy (overall survival: 111 months vs. 46 months; progression-free survival: 12 months vs. 8 months).

Why Combine PD-1 Inhibitors with CIK Cells?

Our laboratory studies have found that:

During CIK cell expansion in the laboratory, "brake" molecules like PD-1 are turned on, which may limit their cancer-fighting ability

PD-1 inhibitors can "release the brakes" on CIK cells, making them more effective

Preliminary data from our small retrospective study suggests that combining PD-1 inhibitors with CIK cells may improve response rates compared to PD-1 inhibitors alone

What is Camrelizumab (SHR-1210)?

Camrelizumab (SHR-1210) is a PD-1 inhibitor developed by Jiangsu Hengrui Medicine Co., Ltd. (China). It is a humanized monoclonal antibody that works similarly to nivolumab and pembrolizumab. Camrelizumab has been tested in multiple early-phase clinical trials in Australia and China, showing acceptable safety and promising anti-tumor activity in various solid tumors.

Important: Camrelizumab (SHR-1210) has received regulatory approval from China's National Medical Products Administration (NMPA Drug Approval Number: 国药准字S20190027) for certain indications, but its use in combination with CIK cells for metastatic kidney cancer is investigational and not yet approved as standard treatment.

1.2 What is the Purpose of This Study?

Primary Objective: To evaluate whether adding autologous (your own) CIK cells to camrelizumab improves clinical outcomes (progression-free survival) compared to camrelizumab alone in patients with metastatic clear cell kidney cancer who have experienced disease progression after first-line treatment with interferon-α or tyrosine kinase inhibitors (TKIs).

Secondary Objectives:

To compare overall survival between the two treatment groups

To compare tumor response rates and disease control rates

To assess safety and side effects of the combination

To evaluate quality of life during treatment

1.3 Study Design: What Type of Study Is This?

This is a prospective, randomized, open-label, controlled clinical trial. This means:

Prospective: Data will be collected going forward from the time you enroll

Randomized: You will be randomly assigned (like flipping a coin) to one of two treatment groups:

Control Group: Camrelizumab alone (200 mg IV every 3 weeks)

Experimental Group: Camrelizumab (200 mg IV every 3 weeks) plus autologous CIK cells (1×10¹⁰ cells IV on Day 14 of each 3-week cycle)

Open-label: You and your doctors will know which treatment you are receiving (blinding is not possible due to the nature of CIK cell therapy, which requires leukapheresis)

Controlled: Your outcomes will be compared to a control group to scientifically evaluate effectiveness

Randomization (Random Assignment):

You have a 50% chance (1 in 2) of being assigned to either group

Assignment is determined by a computer-generated random sequence to ensure fairness

Neither you nor your doctor can choose which treatment you receive

An independent radiologist who does not know your treatment assignment will review your tumor scans to reduce bias

Sample Size:

This study plans to enroll 60-90 patients total (30-45 per group) across multiple centers in China

Participation will last approximately 2-3 years (treatment period plus follow-up)

SECTION 2: ELIGIBILITY – CAN I PARTICIPATE?

2.1 Inclusion Criteria (You Must Meet ALL of These)

To participate in this study, you must meet the following criteria:

Age: 18-75 years old (inclusive)

Voluntary participation: Willing to participate and comply with study requirements

Diagnosis: Pathologically confirmed metastatic or unresectable clear cell renal cell carcinoma

Prior treatment: Disease progression during or after first-line treatment with interferon-α OR a tyrosine kinase inhibitor (TKI) such as sunitinib, sorafenib, or pazopanib

Measurable disease: At least one tumor that can be measured by CT or MRI (≥1 cm in longest diameter)

Performance status: ECOG performance status 0 or 1 (able to carry out normal daily activities with minimal restrictions)

Life expectancy: Expected survival ≥3 months

Adequate organ function (within 14 days before treatment):

Blood counts: White blood cells ≥3.5×10⁹/L, platelets ≥100×10⁹/L, hemoglobin ≥90 g/L

Liver function: AST/ALT <2.5× upper limit of normal (<5× if liver metastases present), total bilirubin <1.5× upper limit of normal

Kidney function: Serum creatinine <1.25× upper limit of normal

Endocrine function: Normal cortisol and thyroid function

Recovery from prior treatment: Toxicities from previous anticancer therapy resolved to Grade 1 or lower (except hair loss)

Contraception (for participants of reproductive potential):

Female participants: Negative pregnancy test; must use effective contraception throughout the study and for 6 months after last dose

Male participants: Must use barrier contraception if partner is of childbearing potential, throughout the study and for 6 months after last dose

2.2 Exclusion Criteria (You CANNOT Participate If Any Apply)

You cannot participate in this study if you:

Have another active cancer requiring treatment (except adequately treated early-stage cancers, skin basal/squamous cell carcinoma, or carcinoma in situ)

Have received an organ or bone marrow transplant from a donor

Are currently participating in another interventional clinical trial, or participated within 1 month before enrollment

Are receiving systemic corticosteroids (>10 mg/day prednisone equivalent) or other immunosuppressive drugs within 3 days before first dose

Have received anti-PD-1, anti-PD-L1, anti-CTLA-4, or other immune checkpoint inhibitor therapy previously

Have active autoimmune disease requiring systemic treatment in the past 2 years

Have known HIV infection, active hepatitis B (HBV-DNA ≥1×10³ copies/mL), or active hepatitis C (HCV-RNA positive)

Have received a live vaccine within 1 month before first dose

Have untreated brain metastases or symptoms from brain metastases

Have active infection requiring IV antibiotics

Have uncontrolled medical conditions (heart disease, lung disease, uncontrolled diabetes, etc.)

Have known severe allergy to any component of camrelizumab or similar drugs

Are pregnant, breastfeeding, or planning pregnancy during the study period

If you have questions about whether you meet these criteria, please ask your study doctor.

SECTION 3: WHAT WILL HAPPEN IF I PARTICIPATE?

3.1 Screening Period (Days -30 to -1)

Purpose: To confirm you are eligible to participate

Before you can join the study, you will undergo screening tests including:

Medical History and Physical Examination:

Complete medical history and review of prior treatments

Full physical examination (including height, weight, blood pressure, heart rate)

Performance status assessment (ECOG scale: measures your ability to perform daily activities)

Quality of life questionnaire (EORTC QLQ-C30)

Laboratory Tests:

Blood tests: Complete blood count, liver function, kidney function, thyroid function, cortisol level, viral hepatitis screening (HBV, HCV, HIV), syphilis test

Urine tests: Urinalysis

Pregnancy test (for women of childbearing potential): Blood or urine test

Imaging Studies:

Tumor assessment: CT or MRI scans of chest, abdomen, pelvis (and brain if clinically indicated) to measure tumor size and location

These scans must be done within 30 days before treatment starts

Cardiac Assessment:

Electrocardiogram (ECG): Heart rhythm test

Pathology Review:

You will be asked to provide tumor tissue samples (from previous biopsy or surgery) for confirmation of clear cell kidney cancer diagnosis

The study doctor will review all test results and inform you whether you are eligible to participate. Screening tests typically take 1-2 weeks. If you do not meet eligibility criteria, you cannot join the study, but your doctor will discuss other treatment options with you.

3.2 Randomization (If You Are Eligible)

If you are eligible, you will be randomly assigned to one of two treatment groups:

Assignment Process:

After all screening tests confirm eligibility and you sign this consent form, a research coordinator will open a sealed envelope containing your treatment assignment

This process ensures fairness and reduces bias

You will be informed immediately which treatment group you are in

3.3 Treatment Period

Control Group: Camrelizumab Monotherapy

Camrelizumab 200 mg IV on Day 1 of each 21-day cycle

Infused intravenously (into a vein) over approximately 30 minutes

Repeated every 3 weeks until disease progression, unacceptable side effects, or your decision to stop

Experimental Group: Camrelizumab + CIK Cells

Camrelizumab 200 mg IV on Day 1 of each 21-day cycle (same as control group)

Plus CIK cell infusion on Day 14 of each cycle:

Step 1 (Days -14 to -10 before Cycle 1): Leukapheresis procedure to collect your white blood cells

Similar to blood donation, but blood is circulated through a machine that separates and collects white blood cells, then returns the rest to you

Takes approximately 90-120 minutes

May cause temporary side effects: tingling around mouth (due to citrate anticoagulant), fatigue, dizziness

Step 2 (Days -10 to 0): Laboratory expansion of your cells over 14 days

Your cells are grown in a specialized GMP-certified laboratory at Tianjin Medical University Cancer Hospital

Cells are treated with growth factors and activating signals to enhance cancer-killing ability

Extensive quality control testing ensures safety and potency

Step 3 (Day 14): Reinfusion of 1×10¹⁰ CIK cells intravenously

Takes 30-60 minutes

You will be monitored closely during and after infusion

Important Notes:

You will continue treatment every 3 weeks until:

Your cancer progresses (grows or spreads)

You experience unacceptable side effects

You decide to withdraw

Your doctor determines it is no longer safe or beneficial to continue

Pseudoprogression consideration: Immunotherapy sometimes causes temporary tumor enlargement before shrinkage. If initial scans show progression but you feel stable, your doctor may recommend continuing treatment and repeating scans in 4 weeks to confirm true progression.

Study Visits and Monitoring:

ASSESSMENT

WHEN PERFORMED

Clinical evaluation (physical exam, vital signs, performance status, quality of life questionnaire)

Before each treatment cycle (Day 1)

Blood and urine tests (complete blood count, liver/kidney function, thyroid function, cortisol)

Before each treatment cycle

Electrocardiogram (ECG)

Before each treatment cycle

Tumor imaging (CT or MRI scans)

Every 6 weeks (every 2 cycles)

Adverse event assessment

Every visit and as needed

What You Need to Do:

Attend all scheduled appointments on time (critical for safety monitoring and data collection)

Report any new symptoms or changes in your condition to your study doctor immediately, even between scheduled visits

Do not take other anti-cancer treatments without informing your study doctor (prohibited during the study)

Use effective contraception throughout the study if you or your partner are of reproductive age

3.4 End-of-Treatment Visit (Within 30 Days After Last Dose)

When you stop study treatment (for any reason), you will have a final evaluation including:

Physical examination and vital signs

Blood and urine tests

ECG

Tumor imaging (CT/MRI) if not done recently

Quality of life questionnaire

Pregnancy test (if applicable)

Discussion of next treatment options

3.5 Follow-up Period (After Treatment Ends)

Purpose: To monitor your long-term outcomes and safety

Frequency: Every 8 weeks after treatment ends

Duration: Until death, loss to follow-up, or 1 year after the last patient enrolls (whichever comes first)

Assessments:

Survival status

Disease status (progression, stable, response)

Subsequent anticancer therapies you receive

Serious side effects potentially related to study treatment

Method: Phone calls or clinic visits (your choice, in consultation with your doctor)

Why is follow-up important?

Some side effects of immunotherapy can occur months after treatment stops

We need to know if the treatment provided long-term benefit

Your participation helps future patients

SECTION 4: WHAT ARE THE POSSIBLE BENEFITS?

4.1 Possible Benefits to You

Potential Direct Benefits:

You may experience slowing or stopping of cancer growth

You may experience tumor shrinkage

Your quality of life may improve

You will receive close medical monitoring and care from a specialized team

IMPORTANT: We cannot guarantee that you will benefit from this treatment. Clinical research involves uncertainty. The experimental treatment (camrelizumab + CIK cells) may be no better, or even worse, than the control treatment (camrelizumab alone) or other available treatments.

4.2 Possible Benefits to Others

Even if you do not personally benefit, your participation may help:

Advance scientific knowledge about kidney cancer treatment

Determine whether combining CIK cells with PD-1 inhibitors is effective

Help future patients with kidney cancer

4.3 What Costs Are Covered?

Provided at No Cost:

Study drug: Camrelizumab (SHR-1210) for up to 4 cycles (provided by Jiangsu Hengrui Medicine Co., Ltd.)

CIK cell therapy: Up to 4 cycles of CIK cell manufacturing and infusion (provided by Tianjin Medical University Cancer Hospital)

NOT Covered (Your Responsibility):

Routine medical care costs (hospitalizations, standard lab tests, imaging beyond research requirements)

Treatment of side effects

Treatment of other medical conditions you may have

Best supportive care (pain management, symptom control)

Travel and lodging expenses for study visits

NO Financial Compensation:

This study does not provide payment for your participation.

SECTION 5: WHAT ARE THE POSSIBLE RISKS AND DISCOMFORTS?

5.1 Known Risks of Camrelizumab (SHR-1210)

Based on clinical trials of camrelizumab in other cancer types, common side effects include:

Very Common (>10% of patients):

Fatigue, weakness

Skin rash, itching

Fever

Nausea

Decreased appetite

Benign hemangioma (small red skin bumps, usually harmless and reversible)

Common (1-10% of patients):

Anemia (low red blood cells)

Elevated liver enzymes

Diarrhea

Vomiting

Headache, dizziness

Hypothyroidism (underactive thyroid)

Rare but Serious (<1% of patients):

Immune-related pneumonitis (lung inflammation): Symptoms include cough, shortness of breath, chest pain. Can be life-threatening if severe.

Immune-related colitis (bowel inflammation): Symptoms include severe diarrhea, abdominal pain, blood in stool. Can lead to bowel perforation.

Immune-related hepatitis (liver inflammation): Symptoms include jaundice (yellowing of skin/eyes), right upper abdominal pain, dark urine. Can cause liver failure.

Immune-related endocrinopathies (hormone gland problems):

Hypophysitis (pituitary inflammation): Headache, vision changes, fatigue

Thyroid disorders: Overactive or underactive thyroid

Adrenal insufficiency: Severe fatigue, low blood pressure, electrolyte abnormalities

Type 1 diabetes: High blood sugar, excessive thirst/urination

Immune-related nephritis (kidney inflammation): Elevated creatinine, decreased urine output

Severe skin reactions: Stevens-Johnson syndrome, toxic epidermal necrolysis (rare, life-threatening)

Neurological toxicities: Guillain-Barré syndrome (muscle weakness/paralysis), myasthenia gravis (muscle weakness), encephalitis (brain inflammation), peripheral neuropathy

Myocarditis (heart muscle inflammation): Chest pain, irregular heartbeat, heart failure

Severe infusion reactions: Allergic reactions during drug administration (anaphylaxis) – rare but potentially fatal

Management: Most immune-related side effects can be controlled with corticosteroids (e.g., prednisone) and temporary interruption of camrelizumab. Severe cases may require hospitalization and permanent discontinuation of treatment. Some endocrine problems (hypothyroidism, adrenal insufficiency, diabetes) may require lifelong hormone replacement.

5.2 Known Risks of CIK Cell Therapy

Common Side Effects:

Fever and chills: Occur in 30-50% of patients, usually mild (≤38.5°C), self-limited

Fatigue, weakness

Mild flu-like symptoms (muscle aches, headache)

Nausea, vomiting (uncommon)

Rash (uncommon)

Related to Leukapheresis Procedure:

Tingling around mouth, hands, feet (due to citrate anticoagulant)

Dizziness, lightheadedness

Fatigue

Bruising at needle insertion sites

Rarely: Infection, bleeding, citrate toxicity (very rare with proper monitoring)

Serious but Rare Risks:

Anaphylaxis (severe allergic reaction): Extremely rare with autologous cells (your own cells), but possible. Symptoms include difficulty breathing, drop in blood pressure, loss of consciousness. Medical staff are trained to manage this emergency.

Graft-versus-host disease (GVHD): Exceptionally rare with autologous cells (more common with donor cells). Would cause skin rash, liver dysfunction, diarrhea.

Transfusion-related reactions: Although CIK cells are your own, contamination during manufacturing or infusion errors could theoretically cause reactions.

5.3 Unknown and Unforeseeable Risks

IMPORTANT: Camrelizumab + CIK cell combination is investigational. There may be side effects that are not yet known, including:

Unexpected or more severe immune-related reactions

Interactions between camrelizumab and CIK cells that worsen toxicity

Long-term effects on your immune system

Risks to fertility (not fully studied)

Cancer Progression: There is a possibility that the study treatment may not work, and your cancer could grow or spread despite treatment, potentially more rapidly than without treatment.

5.4 Risks Related to Research Procedures

Frequent Blood Draws:

Discomfort, pain, bruising at needle sites

Rarely: Infection, fainting

Frequent Imaging (CT/MRI Scans):

Repeated exposure to low-dose radiation (CT scans)

Contrast dye reactions (allergic reactions, kidney problems in susceptible individuals)

Claustrophobia during MRI

Time Commitment and Inconvenience:

Frequent hospital visits may cause stress, fatigue, time away from family/work

5.5 Reproductive Risks

Pregnancy and Fetal Harm:

The effects of camrelizumab and CIK cells on pregnancy and the developing fetus are unknown

If you are pregnant or become pregnant during the study, you must stop treatment immediately and notify your study doctor

Male participants: Camrelizumab may be present in semen; use barrier contraception

Fertility:

It is unknown whether camrelizumab or CIK cell therapy affects fertility (ability to have children in the future)

5.6 What to Do If You Experience Side Effects

Report ALL symptoms and changes in your health to your study doctor immediately, including:

New or worsening symptoms

Any hospitalization or emergency room visit

New medications prescribed by other doctors

Emergency Contact: If you experience severe symptoms (difficulty breathing, severe chest pain, high fever >39°C, severe diarrhea, altered mental status), seek immediate medical attention at the nearest emergency room and inform them you are in a clinical trial.

24-Hour Study Doctor Contact: [Phone number to be filled]

SECTION 6: ARE THERE ALTERNATIVE TREATMENTS?

Participation in this study is voluntary. If you choose not to participate, alternative treatments for your metastatic kidney cancer include:

Standard Approved Treatments:

Tyrosine kinase inhibitors (TKIs):

Cabozantinib, axitinib, lenvatinib, pazopanib, sorafenib

Usually taken as daily pills

Side effects: Diarrhea, high blood pressure, hand-foot syndrome, fatigue

mTOR inhibitors:

Everolimus, temsirolimus

Side effects: Mouth sores, infections, fatigue, high blood sugar

Combination immunotherapy (if not previously received):

Nivolumab + ipilimumab

Pembrolizumab + axitinib

Camrelizumab + axitinib (approved in China as first-line therapy as of November 2019)

Other PD-1/PD-L1 inhibitors:

Nivolumab, pembrolizumab, avelumab + axitinib

Clinical trials: Other investigational treatments

Best supportive care: Symptom management, palliative care, hospice

Discuss with Your Doctor: Your doctor will explain which options are most appropriate for your specific situation, considering your prior treatments, overall health, and personal preferences.

SECTION 7: CONFIDENTIALITY – HOW WILL MY INFORMATION BE PROTECTED?

7.1 What Information Will Be Collected?

If you participate, the following information will be collected and recorded:

Personal identifiers (name, date of birth, medical record number, contact information)

Medical history and current health status

Study treatment details (doses, dates, responses)

Laboratory test results

Imaging scan results

Side effects and adverse events

Quality of life assessments

Survival status and subsequent treatments

7.2 Who Will Have Access to My Information?

Authorized Personnel:

Study doctors and nurses at Tianjin Medical University Cancer Hospital

Research coordinators and data managers

Sponsor representatives (Jiangsu Hengrui Medicine Co., Ltd.) for drug safety monitoring

Independent monitors verifying data accuracy

Ethics Committee members reviewing the study

Regulatory authorities (China National Medical Products Administration, if audited)

Access Limitations:

Only authorized personnel listed on a delegation log may access your records

All personnel sign confidentiality agreements

7.3 How Will My Privacy Be Protected?

De-identification:

In research databases and reports, you will be identified only by a unique study ID number (e.g., PD1-CIK-001), not by name

Study documents linking your name to your ID number will be stored separately in a locked cabinet

Data Security:

Electronic data stored on password-protected, encrypted computers

Paper records stored in locked file cabinets in secure offices

Data transmitted to sponsor via encrypted email or secure file transfer

Publications and Presentations:

Results may be published in medical journals or presented at conferences

Your name will NOT appear in any publication or presentation

Only aggregate (group) data will be reported

7.4 Limits to Confidentiality

Legal Exceptions: Confidentiality may be breached if:

Required by law (e.g., reporting of certain infectious diseases)

Court order or subpoena

Suspected child/elder abuse (mandatory reporting in China)

Imminent harm to yourself or others

7.5 Data Retention

Your study records will be retained for 15 years after study completion, per Chinese GCP regulations, then securely destroyed.

7.6 Can I Access My Data?

You have the right to request access to your study data and medical records. Contact your study doctor to arrange this.

SECTION 8: WHAT ARE MY RIGHTS AS A PARTICIPANT?

8.1 Voluntary Participation

Participation is completely voluntary. You may:

Refuse to participate without giving a reason

Your decision will NOT affect your medical care or relationship with your doctors

You will still receive the best available standard treatment for your cancer

8.2 Right to Withdraw

You may withdraw from the study at any time, for any reason, without penalty. If you withdraw:

Your current medical care will continue

You will not lose any benefits you are entitled to

You will be asked (but not required) to complete an end-of-treatment evaluation for safety

How to Withdraw:

Inform your study doctor verbally or in writing

You do not have to explain your reason

Use of Data After Withdrawal:

Data collected before your withdrawal will still be used in the study analysis (required to ensure scientific validity)

No new data will be collected after withdrawal unless you specifically consent to continued follow-up

8.3 Circumstances When Your Participation May Be Terminated by the Study Doctor

Your study doctor may remove you from the study without your consent if:

It is in your best medical interest (e.g., serious side effects, disease progression)

You do not follow study requirements (e.g., miss appointments, take prohibited medications)

The study is stopped by the sponsor, regulatory authorities, or ethics committee

You become pregnant

If removed, you will be informed of the reason and offered alternative treatments.

8.4 New Information

If important new information becomes available during the study that may affect your willingness to continue (e.g., new safety data, new treatment options), your study doctor will inform you promptly. You may be asked to sign an updated consent form.

8.5 Study Results

Will I Learn the Results?

You will be informed of your own treatment outcomes (tumor response, survival)

Overall study results will be available after completion and analysis (estimated 2025-2026)

You may request a lay summary of results from your study doctor

SECTION 9: COMPENSATION AND MEDICAL CARE FOR RESEARCH-RELATED INJURY

9.1 What If I Am Injured Due to the Study?

Medical Care for Research-Related Injury:

If you experience a physical injury directly caused by study procedures or study drug, medical treatment will be provided at no cost to you

This includes:

Emergency treatment

Hospitalization

Necessary procedures to treat the injury

Follow-up care until the injury resolves

What is a "Research-Related Injury"? I need to continue generating Appendix E (the complete Informed Consent Form in English). Let me continue from where I left off:

SECTION 9: COMPENSATION AND MEDICAL CARE FOR RESEARCH-RELATED INJURY (continued)

9.1 What If I Am Injured Due to the Study? (continued)

What is a "Research-Related Injury"?

A physical injury or illness directly caused by:

Study drug (camrelizumab)

CIK cell therapy or leukapheresis procedure

Study-required procedures (e.g., blood draws, imaging beyond standard care)

What is NOT Covered:

Injury or illness caused by:

Your underlying cancer (disease progression)

Pre-existing medical conditions

Failure to follow study instructions

Standard medical care unrelated to the study

Process:

Inform your study doctor immediately if you believe you have been injured

Your doctor will evaluate whether the injury is research-related

If confirmed, treatment will be provided at no cost per Chinese regulations

Documentation will be submitted to the Ethics Committee and sponsor

9.2 Financial Compensation

NO Financial Compensation for Injury:

This study does not provide monetary compensation for pain, suffering, lost wages, or disability resulting from research-related injury

Medical treatment for research-related injury is provided, but you will not receive cash payments beyond treatment costs

NO Payment for Participation:

You will not be paid to participate in this study

Study drug and CIK cell therapy are provided free of charge (up to 4 cycles each)

Routine medical care costs remain your responsibility (or covered by your insurance)

Reimbursement for Expenses:

Transportation and lodging costs for study visits are not reimbursed

9.3 Contact for Questions About Injury

If you believe you have experienced a research-related injury:

Study Doctor: [Name], Tel: [Phone]

Ethics Committee: Tianjin Medical University Cancer Hospital Ethics Committee, Tel: [Phone]

Study Sponsor Representative: [Contact details]

SECTION 10: WHO DO I CONTACT IF I HAVE QUESTIONS?

10.1 Questions About the Study

For questions about:

Study procedures

Eligibility

Treatment schedules

Side effects

Results of your tests

Contact Your Study Doctor:

Name: [To be filled by site]

Title: [To be filled]

Phone: [To be filled]

24-Hour Emergency Contact: [To be filled]

Email: [Optional]

10.2 Questions About Your Rights as a Research Participant

If you have questions, concerns, or complaints about:

Your rights as a research participant

How this study is being conducted

Research-related injury

Ethical concerns

Contact the Ethics Committee:

Institution: Tianjin Medical University Cancer Hospital and Institute Ethics Committee

Phone: [To be filled]

Address: [To be filled]

Email: [To be filled]

The Ethics Committee is an independent group of professionals who review and monitor research studies to protect participant rights and welfare.

10.3 Questions About Study Drug (Camrelizumab)

For questions about camrelizumab (SHR-1210) drug safety:

Sponsor: Jiangsu Hengrui Medicine Co., Ltd.

Contact: [To be filled]

Phone: [To be filled]

SECTION 11: CONSENT TO PARTICIPATE

Summary of Your Understanding

Before you sign this form, please confirm that you understand:

☐ I have read this informed consent form (or it has been read to me)

☐ The purpose and procedures of this research study have been explained to me

☐ I understand this is a research study comparing two treatments: camrelizumab alone vs. camrelizumab + CIK cells

☐ I understand I will be randomly assigned to one of two treatment groups and cannot choose which one

☐ I understand the possible benefits, risks, and discomforts

☐ I understand that participation is voluntary and I can withdraw at any time without penalty

☐ I understand my medical records may be reviewed by authorized personnel

☐ I understand I will receive a signed copy of this consent form

☐ I have had the opportunity to ask questions and all my questions have been answered

☐ I have had sufficient time to consider my decision

☐ I understand I can ask questions at any time during the study

Optional Consents (Check if you agree):

☐ Biological Sample Storage: I agree to allow leftover blood/tissue samples to be stored for future research (de-identified). You may decline this and still participate in the main study.

☐ Future Contact: I agree to be contacted in the future about other research studies I may be eligible for. You may decline this and still participate in the main study.

☐ Long-Term Follow-Up: After I complete or withdraw from treatment, I agree to be contacted every 8 weeks for survival and disease status information. You may decline this and still participate in the main study.

SIGNATURE PAGE

INFORMED CONSENT FOR PARTICIPATION IN CLINICAL RESEARCH

Study Title: Camrelizumab (SHR-1210) with or without Cytokine-Induced Killer Cells for Metastatic Renal Clear Cell Carcinoma: A Multi-Center, Prospective, Randomized Controlled Clinical Trial

Protocol Number: PD1-CIK-mRCC

Study Site: Tianjin Medical University Cancer Institute and Hospital

PARTICIPANT STATEMENT AND SIGNATURE

I confirm that:

I have read and understood this informed consent form (or it has been read to me)

I have had the opportunity to ask questions and all my questions have been answered to my satisfaction

I understand that my participation is voluntary and I may withdraw at any time

I understand the purpose, procedures, risks, and benefits of this study

I voluntarily agree to participate in this research study

I will receive a signed copy of this consent form

I authorize the collection, use, storage, and transfer of my personal data as described in this form

By signing below, I agree to participate in this study.

PARTICIPANT INFORMATION

SIGNATURE

Participant Name (print): _________________________

Participant Signature: _________________________

Date of Birth: _____ / _____ / _________ (DD/MM/YYYY)

Date Signed: _____ / _____ / _________

Contact Phone Number: _________________________

Time: ________ (24-hour format)

Participant ID (assigned by study site): _________________________

LEGALLY AUTHORIZED REPRESENTATIVE (If Applicable)

Complete this section only if the participant is unable to provide consent due to physical/cognitive impairment

I confirm that I am the legally authorized representative of the above-named participant and have authority to provide consent on their behalf. I have read this informed consent form (or it has been read to me), understand the study, and consent to the participant's enrollment.

REPRESENTATIVE INFORMATION

SIGNATURE

Representative Name (print): _________________________

Representative Signature: _________________________

Relationship to Participant: _________________________

Date Signed: _____ / _____ / _________

Contact Phone Number: _________________________

Time: ________

Legal Authority (check one): ☐ Legal Guardian<br>☐ Power of Attorney☐ Court-Appointed Representative☐ Other: _________________

IMPARTIAL WITNESS (If Applicable)

Required if participant/representative cannot read; witness must be present for entire consent process

I confirm that:

I was present during the entire informed consent discussion

The information in this consent form was accurately explained to the participant (or legal representative)

The participant (or legal representative) appeared to understand the information

The participant (or legal representative) freely gave consent to participate

WITNESS INFORMATION

SIGNATURE

Witness Name (print): _________________________

Witness Signature: _________________________

Contact Phone Number: _________________________

Date Signed: _____ / _____ / _________

Time: ________

PERSON OBTAINING CONSENT (Study Staff)

I confirm that:

I have explained the nature, purpose, procedures, risks, and benefits of this research study to the participant (or legal representative)

I have answered all questions to the best of my ability

The participant (or legal representative) demonstrated understanding of the study

Consent was given freely without coercion

The participant (or legal representative) has received a signed copy of this consent form

I will conduct this study in accordance with the approved protocol, Good Clinical Practice (GCP) guidelines, and applicable regulations

STUDY STAFF INFORMATION

SIGNATURE

Name of Person Obtaining Consent (print): _________________________

Signature: _________________________

Role in Study (check one): ☐ Principal Investigator☐ Sub-Investigator☐ Research Nurse☐ Research Coordinator

Date Signed: _____ / _____ / _________

Qualifications: _________________________

Time: ________

Contact Phone Number: _________________________

COPIES OF THIS CONSENT FORM

Original: Retained in regulatory files at study site

Copy 1: Given to participant (or legal representative)

Copy 2: Filed in participant's medical record

PARTICIPANT ACKNOWLEDGMENT OF RECEIPT

I acknowledge that I have received a signed copy of this informed consent form.

Participant Initials: _______ Date: _____ / _____ / _________

END OF INFORMED CONSENT FORM

**For Questions or Concerns:**

| **CONTACT TYPE** | **NAME/ORGANIZATION** | **PHONE** |
| --- | --- | --- |
| **Study Doctor (24/7)** | [To be filled by site] | [Phone] |
| **Ethics Committee** | Tianjin Medical University Cancer Hospital Ethics Committee | [Phone] |
| **Study Sponsor** | Jiangsu Hengrui Medicine Co., Ltd. | [Phone] |

**Version**: 1.0 | **Date**: 29 October 2018 | **Protocol**: PD1-CIK-mRCC | **NCT03987698**
