# Supplementary material for: Camrelizumab with or without Autologous Cytokine-induced Killer Cell Therapy in Patients with Refractory Clear Cell Renal Cell Carcinoma: A Randomized Pilot Study
Source: Research Square preprint supplement (doi:10.21203/rs.3.rs-7792293/v1), 2025-11-13
Supplement: Supplementary file 2 [file d2b0f3f3177d2e7a00c6111d.docx]

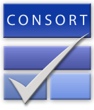
CONSORT 2010 checklist of information to include when reporting a randomised trial*

| Section/Topic | Item No | Checklist item | Reported on page No |
| --- | --- | --- | --- |
| Title and abstract | | | |
|  | 1a | Identification as a randomised trial in the title | Page 1 Title |
| 1b | Structured summary of trial design, methods, results, and conclusions (for specific guidance see CONSORT for abstracts) | Page 1 Abstract |
| Introduction | | | |
| Background and objectives | 2a | Scientific background and explanation of rationale | Page 2 Introduction paragraphs 1-4 |
| 2b | Specific objectives or hypotheses | Page 2  Introduction final paragraph |
| Methods | | | |
| Trial design | 3a | Description of trial design (such as parallel, factorial) including allocation ratio | Page 3  Study Design and Randomization |
| 3b | Important changes to methods after trial commencement (such as eligibility criteria), with reasons | Page 4  Statistical Analysis |
| Participants | 4a | Eligibility criteria for participants | Page 2  Patients |
| 4b | Settings and locations where the data were collected | Page 3  Study Design |
| Interventions | 5 | The interventions for each group with sufficient details to allow replication, including how and when they were actually administered | Pages 3, Study Design; Supplementary Protocol Section 5 |
| Outcomes | 6a | Completely defined pre-specified primary and secondary outcome measures, including how and when they were assessed | Pages 3  End Points and Assessments;  Supplementary Protocol Section 7 |
| 6b | Any changes to trial outcomes after the trial commenced, with reasons | No changes to pre-specified endpoints |
| Sample size | 7a | How sample size was determined | Page 4  Statistical Analysis |
| 7b | When applicable, explanation of any interim analyses and stopping guidelines | Page 4  Statistical Analysis;  Supplementary Protocol Section 9.6 |
| Randomisation: |  |  |  |
| Sequence generation | 8a | Method used to generate the random allocation sequence | Page 3  Randomization;  Supplementary Protocol Section 3.3 |
| 8b | Type of randomisation; details of any restriction (such as blocking and block size) | Page 3  Randomization |
| Allocation concealment mechanism | 9 | Mechanism used to implement the random allocation sequence (such as sequentially numbered containers), describing any steps taken to conceal the sequence until interventions were assigned | Page 3  Randomization;  Supplementary Protocol Section 3.3 |
| Implementation | 10 | Who generated the random allocation sequence, who enrolled participants, and who assigned participants to interventions | Page 3  Randomization |
| Blinding | 11a | If done, who was blinded after assignment to interventions (for example, participants, care providers, those assessing outcomes) and how | Open-label trial |
| 11b | If relevant, description of the similarity of interventions | Open-label trial |
| Statistical methods | 12a | Statistical methods used to compare groups for primary and secondary outcomes | Page 4  Statistical Analysis |
| 12b | Methods for additional analyses, such as subgroup analyses and adjusted analyses | Page 4  Statistical Analysis |
| Results | | | |
| Participant flow (a diagram is strongly recommended) | 13a | For each group, the numbers of participants who were randomly assigned, received intended treatment, and were analysed for the primary outcome | Page 5  Patient Characteristics  Supplementary Appendix Table S4 |
| 13b | For each group, losses and exclusions after randomisation, together with reasons | Page 7, Figure 1B;  Page 10, Safety |
| Recruitment | 14a | Dates defining the periods of recruitment and follow-up | Page 5  Patient Characteristics |
| 14b | Why the trial ended or was stopped | Page 4  Statistical Analysis |
| Baseline data | 15 | A table showing baseline demographic and clinical characteristics for each group | Page 4  Table 1 |
| Numbers analysed | 16 | For each group, number of participants (denominator) included in each analysis and whether the analysis was by original assigned groups | Page 5  Patient Characteristics  Supplementary Appendix Table S4 |
| Outcomes and estimation | 17a | For each primary and secondary outcome, results for each group, and the estimated effect size and its precision (such as 95% confidence interval) | Page 6  Efficacy |
| 17b | For binary outcomes, presentation of both absolute and relative effect sizes is recommended | Page 6  Tumor Response |
| Ancillary analyses | 18 | Results of any other analyses performed, including subgroup analyses and adjusted analyses, distinguishing pre-specified from exploratory | Page 8-9  Overall Survival and Progression-free Survival  Supplementary Figure S6~S8 |
| Harms | 19 | All important harms or unintended effects in each group (for specific guidance see CONSORT for harms) | Page 10, Safety |
| Discussion | | | |
| Limitations | 20 | Trial limitations, addressing sources of potential bias, imprecision, and, if relevant, multiplicity of analyses | Page 14  Limitations |
| Generalisability | 21 | Generalisability (external validity, applicability) of the trial findings | Page 12  Discussion |
| Interpretation | 22 | Interpretation consistent with results, balancing benefits and harms, and considering other relevant evidence | Page 13  Discussion |
| Other information | | | Page 1  Abstract |
| Registration | 23 | Registration number and name of trial registry | Page 3  Study Design |
| Protocol | 24 | Where the full trial protocol can be accessed, if available | Supplementary Material |
| Funding | 25 | Sources of funding and other support (such as supply of drugs), role of funders | Page 18  Funding |

Citation: Schulz KF, Altman DG, Moher D, for the CONSORT Group. CONSORT 2010 Statement: updated guidelines for reporting parallel group randomised trials. BMC Medicine. 2010;8:18.
© 2010 Schulz et al. This is an Open Access article distributed under the terms of the Creative Commons Attribution License (<http://creativecommons.org/licenses/by/2.0>), which permits unrestricted use, distribution, and reproduction in any medium, provided the original work is properly cited.

*We strongly recommend reading this statement in conjunction with the CONSORT 2010 Explanation and Elaboration for important clarifications on all the items. If relevant, we also recommend reading CONSORT extensions for cluster randomised trials, non-inferiority and equivalence trials, non-pharmacological treatments, herbal interventions, and pragmatic trials. Additional extensions are forthcoming: for those and for up-to-date references relevant to this checklist, see [www.consort-statement.org](http://www.consort-statement.org).
