# Supplementary material for: Camrelizumab with or without Autologous Cytokine-induced Killer Cell Therapy in Patients with Refractory Clear Cell Renal Cell Carcinoma: A Randomized Pilot Study
Source: Research Square preprint supplement (doi:10.21203/rs.3.rs-7792293/v1), 2025-11-13
Supplement: Supplementary file 3 [file d836e9e5b5e8116c6b791e7a.docx]

**Supplementary Appendix**


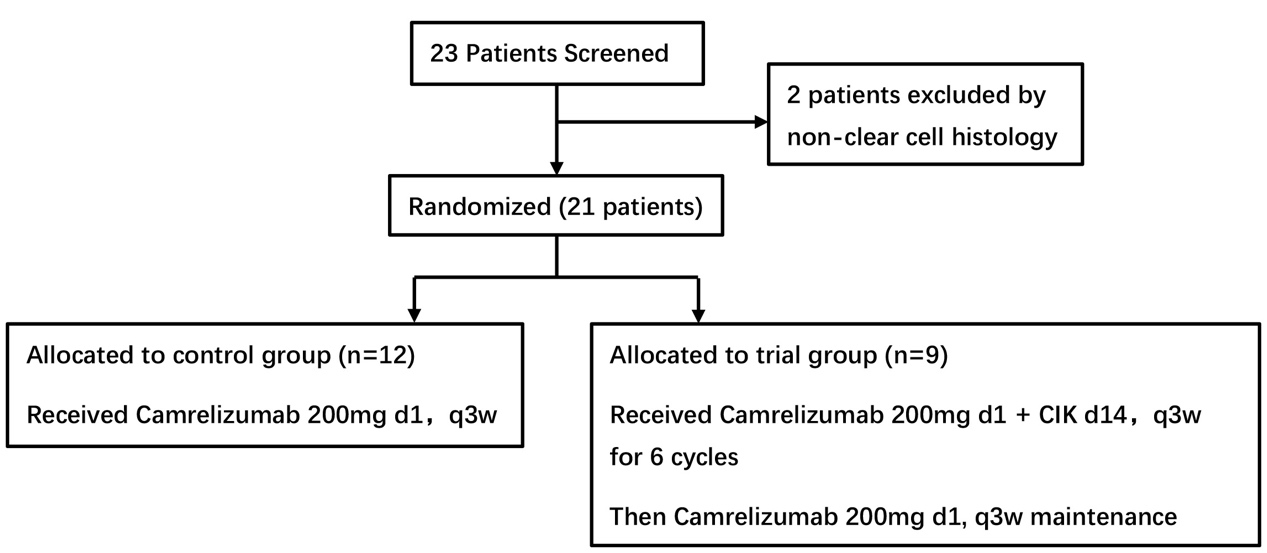


**Figure S1. CONSORT Diagram.**


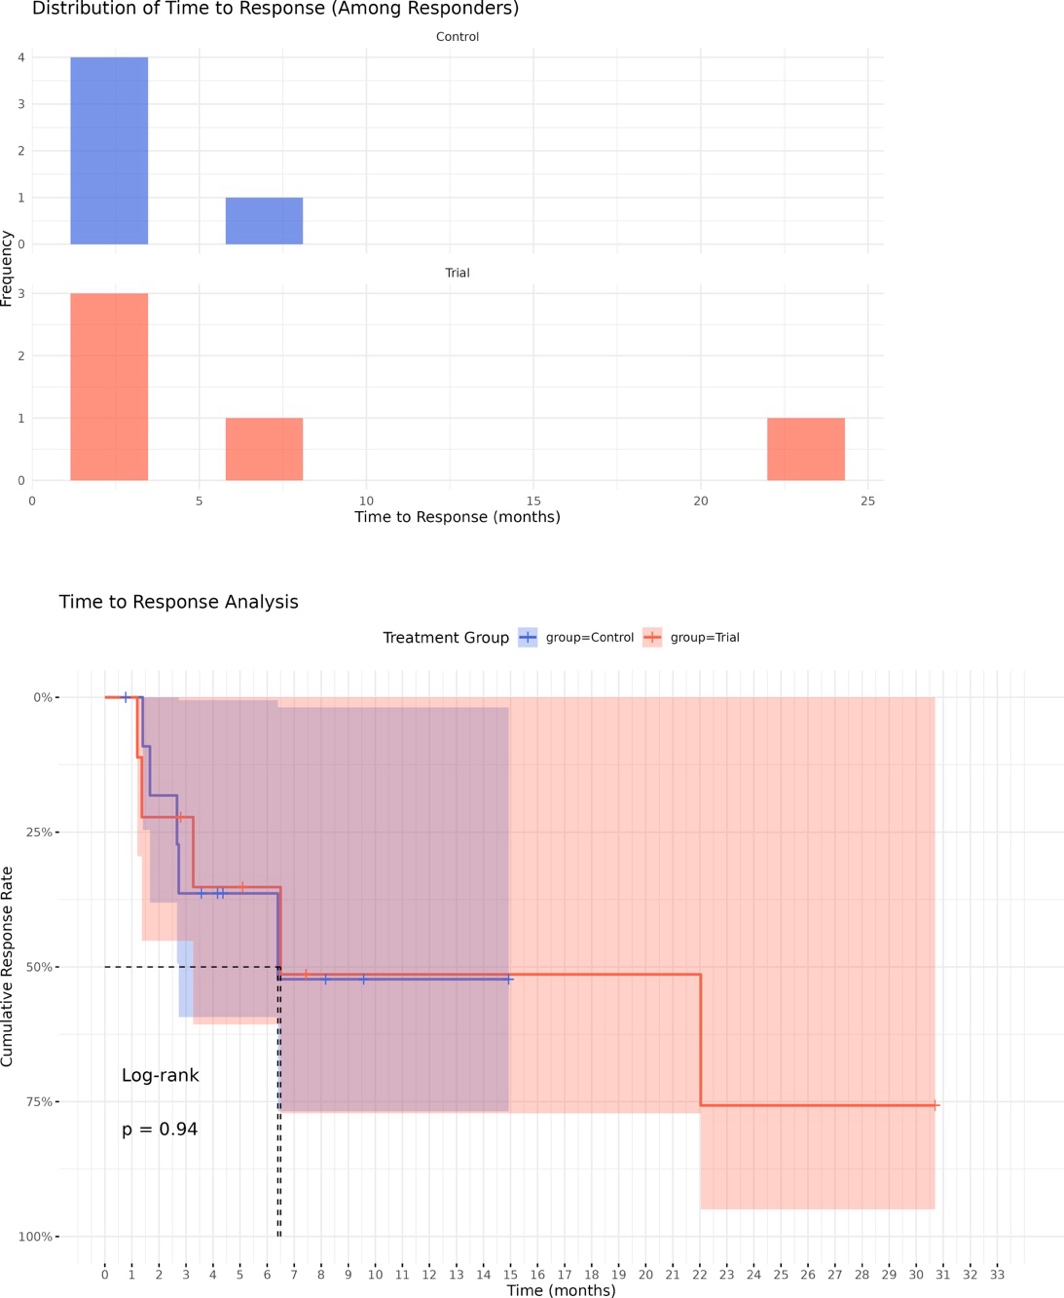


**Figure S2. Analysis of time to response among the treatment groups.** A. Distribution of time to response among patients exhibiting objective response. One patient had delayed imaging assessment, which may have affected time-to-response data. Sensitivity analysis excluding this case showed similar results (median TTR: 6.4 vs 6.5 months, p=0.84). B. Kaplan-Meier analysis of time to response. No statistically significant differences were detected.


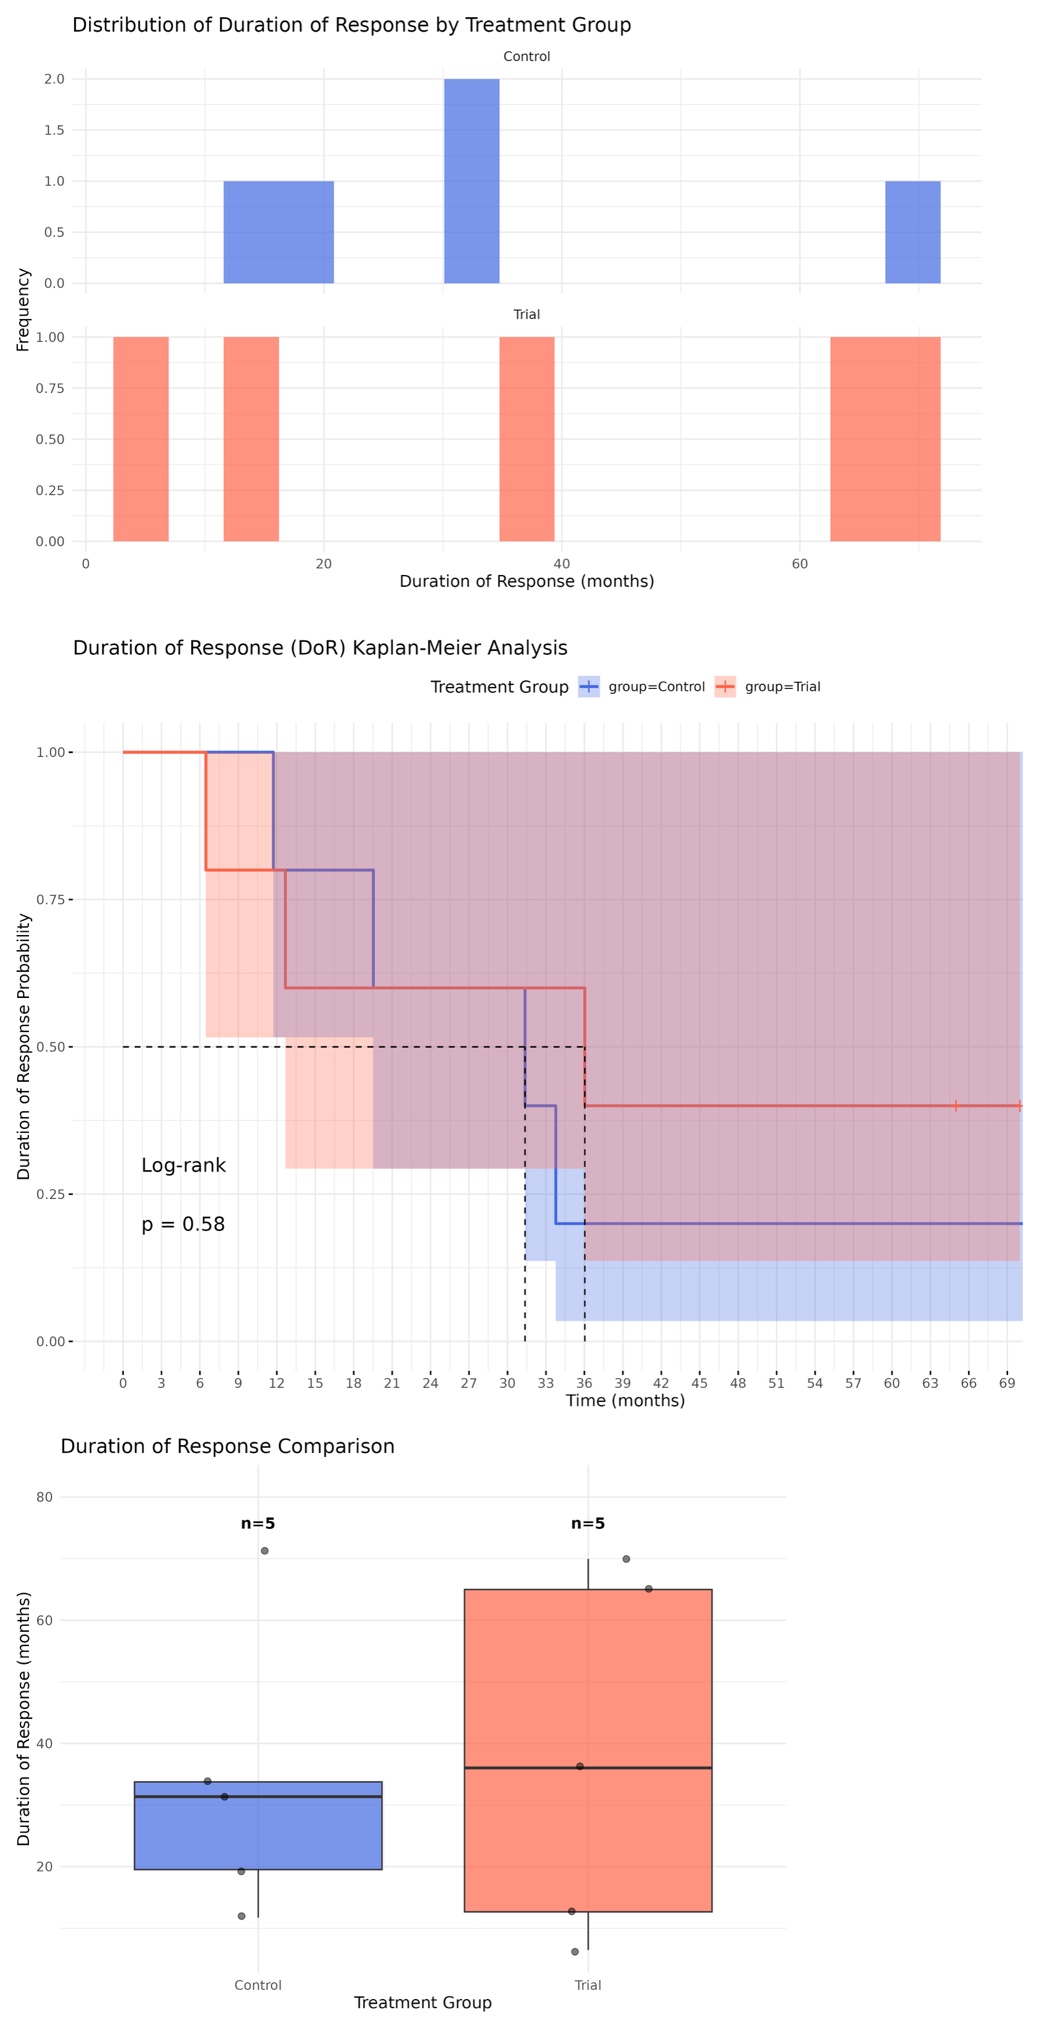


**Figure S3. Analysis of response duration among the treatment groups.** A. Distribution of response duration among patients exhibiting objective response. B. Kaplan-Meier analysis of response duration, indicating no statistical significance. C. Box plot illustrating response duration analysis. Patients in the trial group with an objective response demonstrated a tendency toward a longer response duration, although this was not statistically significant.

**Table S4. Detailed information on the enrolled patients.**

| **Patient ID** | **Sex** | **Age** | **Treatment Group** | **MSKCC Risk** | **Previous Nephrectomy** | **Previous Treatment** | **Best Response** | **PFS Months** | **Progression Status** | **OS Months** | **Status** |
| --- | --- | --- | --- | --- | --- | --- | --- | --- | --- | --- | --- |
| P1 | Female | 68 | Control | Favorable | Yes | Anlotinib | PR | 74.07 | No | 74.07 | Alive |
| P2 | Male | 64 | Control | Intermediate | Yes | Sunitinib | SD | 4.17 | Yes | 48.70 | Alive |
| P3 | Male | 63 | Control | Favorable | Yes | Sorafenib | PR | 20.93 | Yes | 41.00 | Alive |
| P4 | Male | 64 | Control | Poor | Yes | Sunitinib–Axitinib | SD | 4.37 | Yes | 9.03 | Dead |
| P5 | Female | 59 | Control | Favorable | Yes | Sunitinib-Pazopanib | SD | 8.17 | Yes | 62.17 | Alive |
| P6 | Female | 63 | Control | Intermediate | Yes | Sunitinib | PR | 13.40 | Yes | 48.27 | Alive |
| P7 | Male | 49 | Control | Favorable | Yes | Anlotinib-Vorolanib | SD | 2.73 | Yes | 18.73 | Dead |
| P8 | Male | 58 | Control | Intermediate | Yes | Sorafenib | PR | 34.03 | Yes | 61.07 | Alive |
| P9 | Male | 68 | Control | Intermediate | No | Sunitinib | PD | 1.53 | Yes | 17.07 | Dead |
| P10 | Male | 57 | Control | Intermediate | Yes | Cytokine-Sorafenib-Pazopanib-Anlotinib | PR | 40.17 | Yes | 57.47 | Dead |
| P11 | Male | 62 | Control | Intermediate | No | Sunitinib | SD | 9.57 | Yes | 30.70 | Dead |
| P12 | Female | 51 | Control | Poor | No | Sunitinib | PD | 0.77 | Yes | 1.07 | Dead |
| P13 | Male | 72 | Tiral | Intermediate | Yes | Cytokine-Vorolanib | SD | 5.07 | Yes | 37.10 | Dead |
| P14 | Male | 53 | Tiral | Intermediate | Yes | Sunitinib-Axitinib | CMR | 65.93 | No | 65.93 | Alive |
| P15 | Male | 59 | Tiral | Favorable | Yes | Cytokine-Sorafenib | PR | 39.30 | Yes | 65.97 | Alive |
| P16 | Male | 66 | Tiral | Poor | Yes | Cytokine-Sunitinib | PR | 19.17 | Yes | 60.77 | Alive |
| P17 | Female | 74 | Tiral | Favorable | No | Axitinib | SD | 4.17 | Yes | 15.20 | Dead |
| P18 | Male | 61 | Tiral | Favorable | Yes | Pazopanib-Vorolanib-Axitinib | PR | 71.33 | No | 71.33 | Alive |
| P19 | Male | 73 | Tiral | Favorable | Yes | Sorafenib-Axitinib | SD | 10.83 | Yes | 48.83 | Alive |
| P20 | Male | 68 | Tiral | Intermediate | Yes | Sunitinib | PR | 28.50 | Yes | 49.77 | Dead |
| P21 | Male | 62 | Tiral | Favorable | Yes | Cytokine | SD | 60.33 | No | 60.33 | Dead |

PFS, progression-free survival; OS, overall survival; CMR, complete metabolic response; PR, partial response; SD, stable disease; PD, progressive disease.


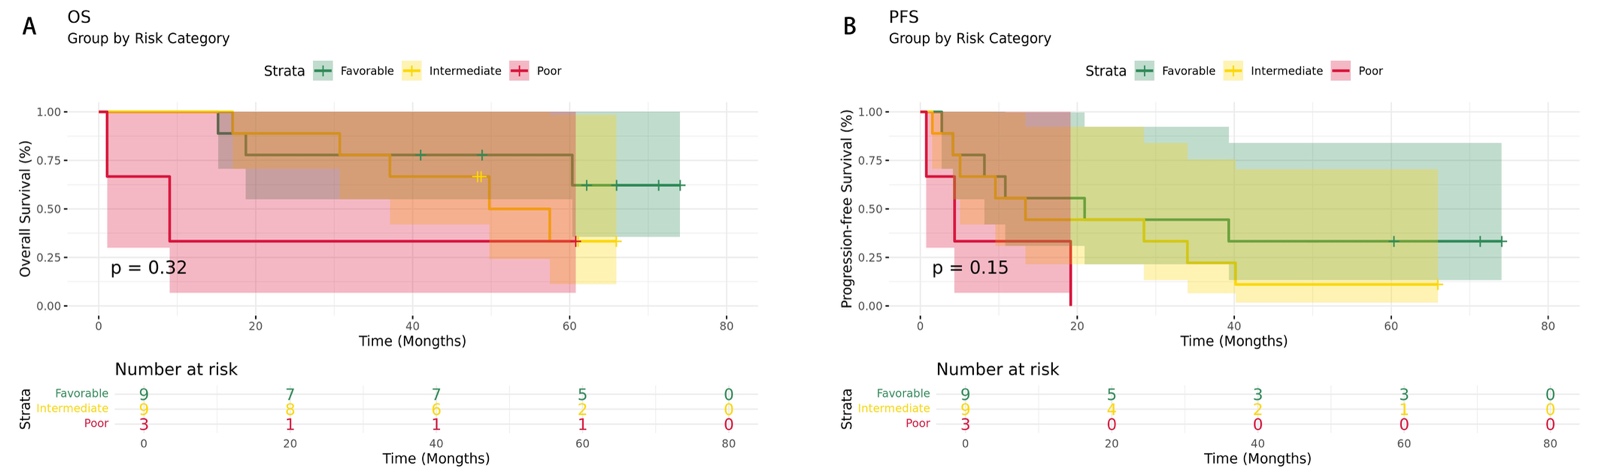


**Figure S5. Kaplan-Meier analysis of overall survival and progression-free survival by MSKCC risk category.** A. Overall survival analysis in all patients presented by favorable, intermediate, and poor-risk groups. B. Progression-free survival analysis in all patients, presented by favorable, intermediate, and poor-risk groups. OS, overall survival; PFS, progression-free survival.


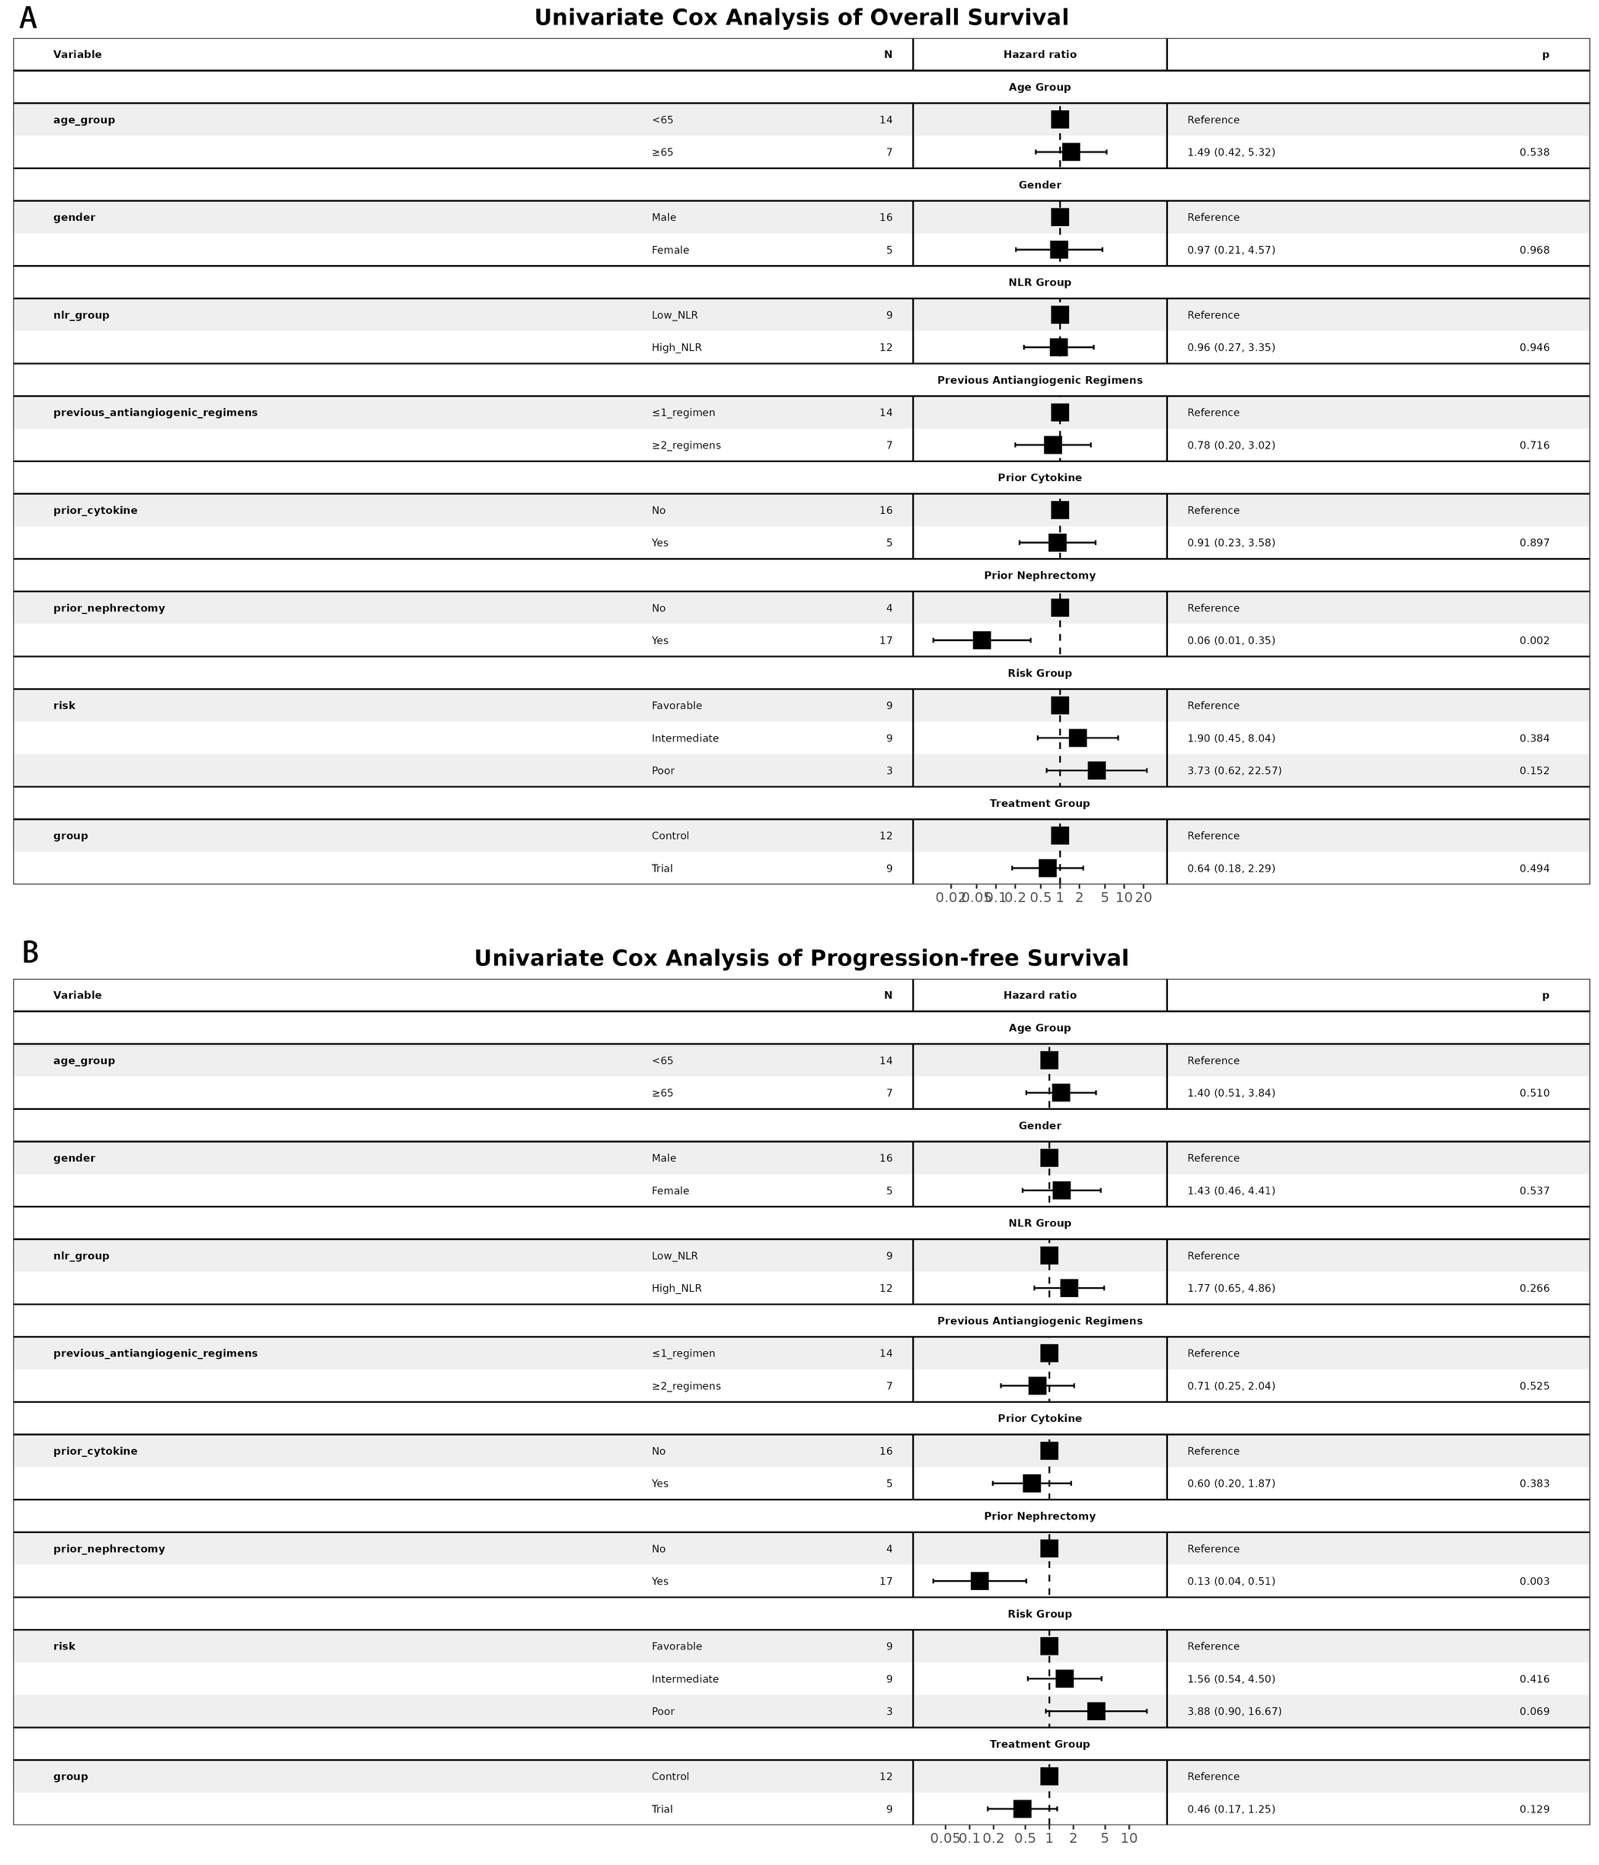


**Figure S6.** **Forest plot of univariate Cox analysis.**A. Univariate Cox analysis for overall survival. B. Univariate Cox analysis for progression-free survival. Only prior nephrectomy shows statistical significance.


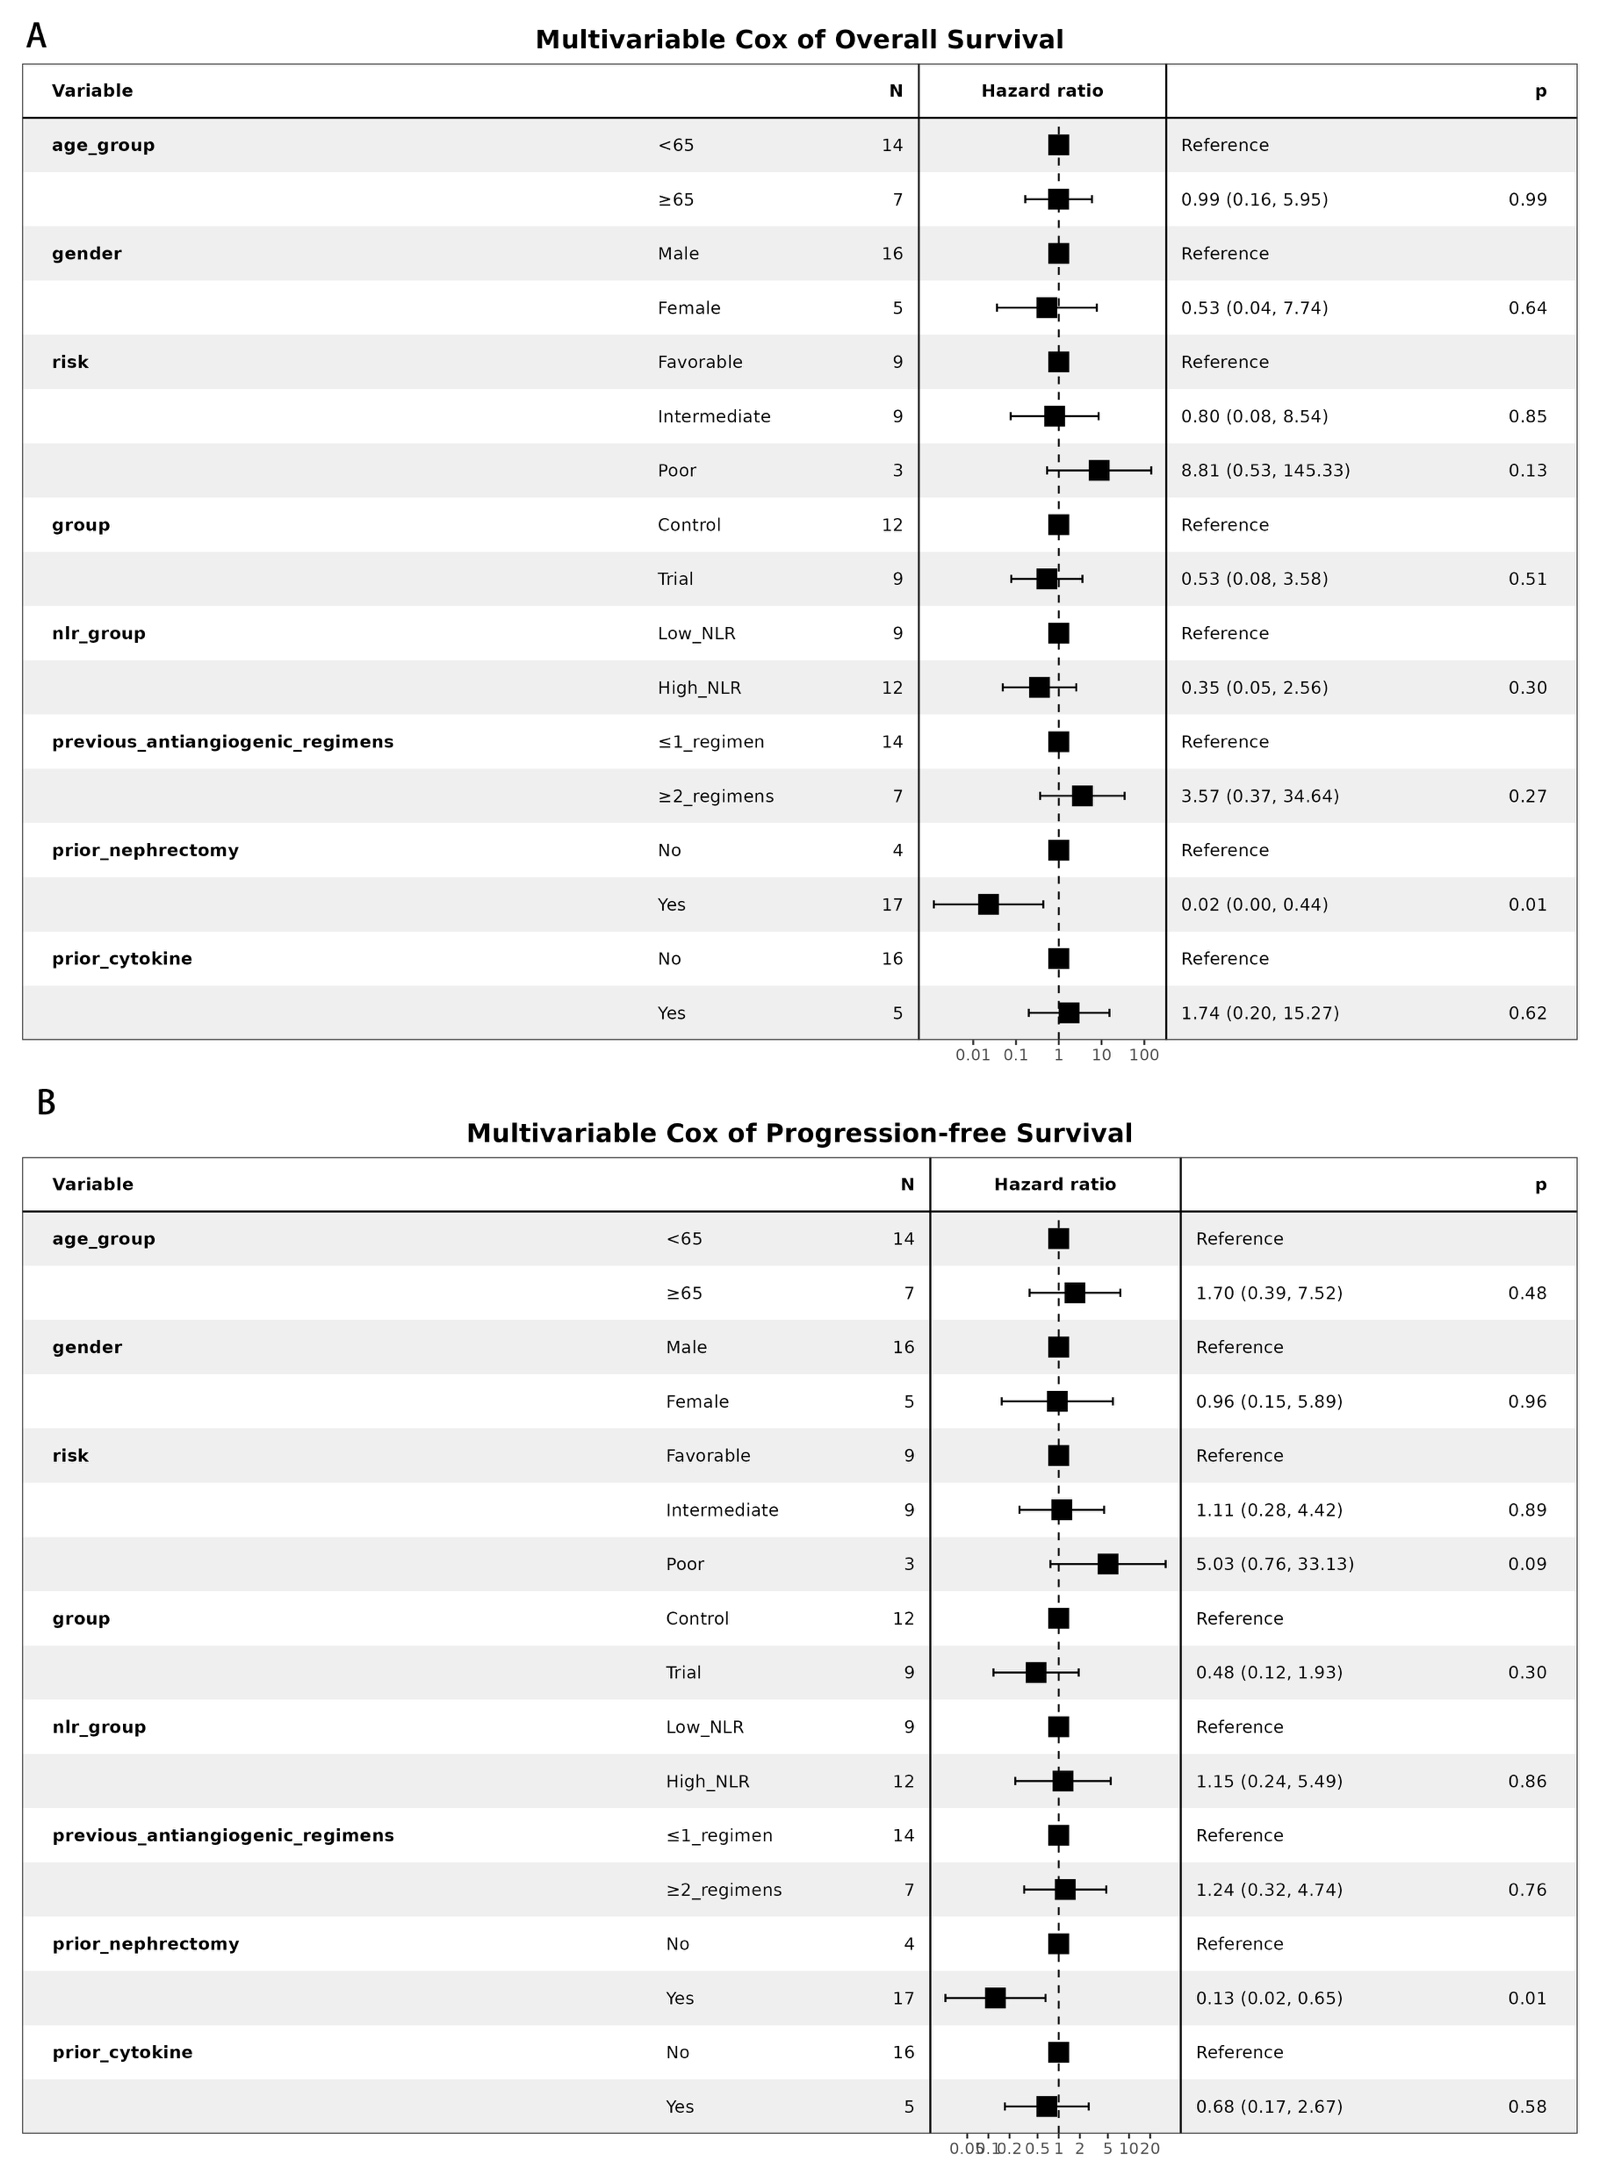


**Figure S7. Forest plot of multivariate Cox analysis.** A. Multivariate Cox analysis for overall survival. B. Multivariate Cox analysis for progression-free survival. Only prior nephrectomy shows statistical significance.


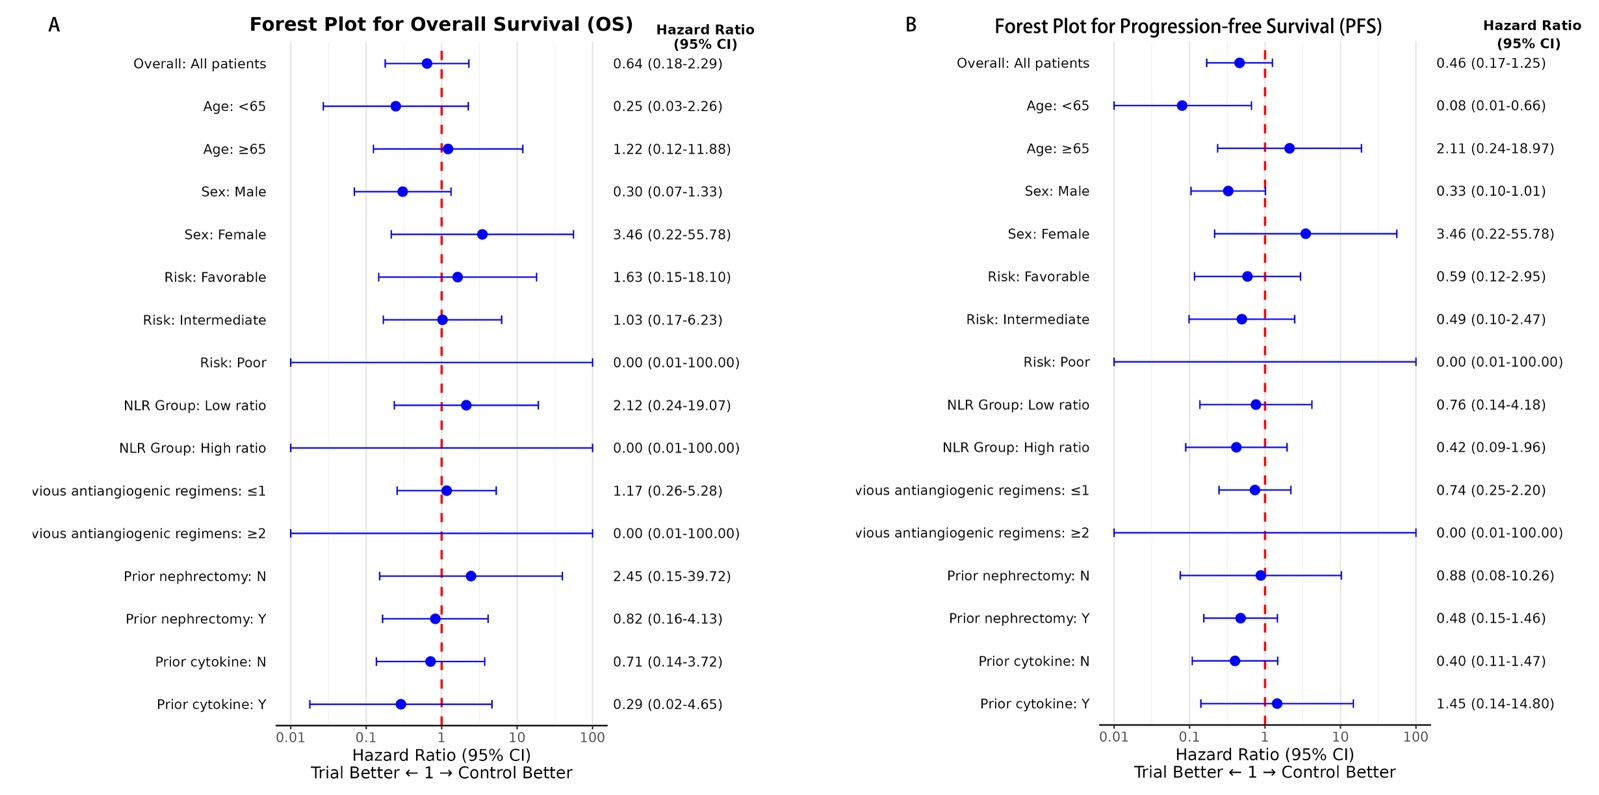


**Figure S8. The forest plot for the subgroup analysis.** A. Subgroup analysis of overall survival. B. Subgroup analysis of progression-free survival. Both may not be an accurate reference due to a small sample size.


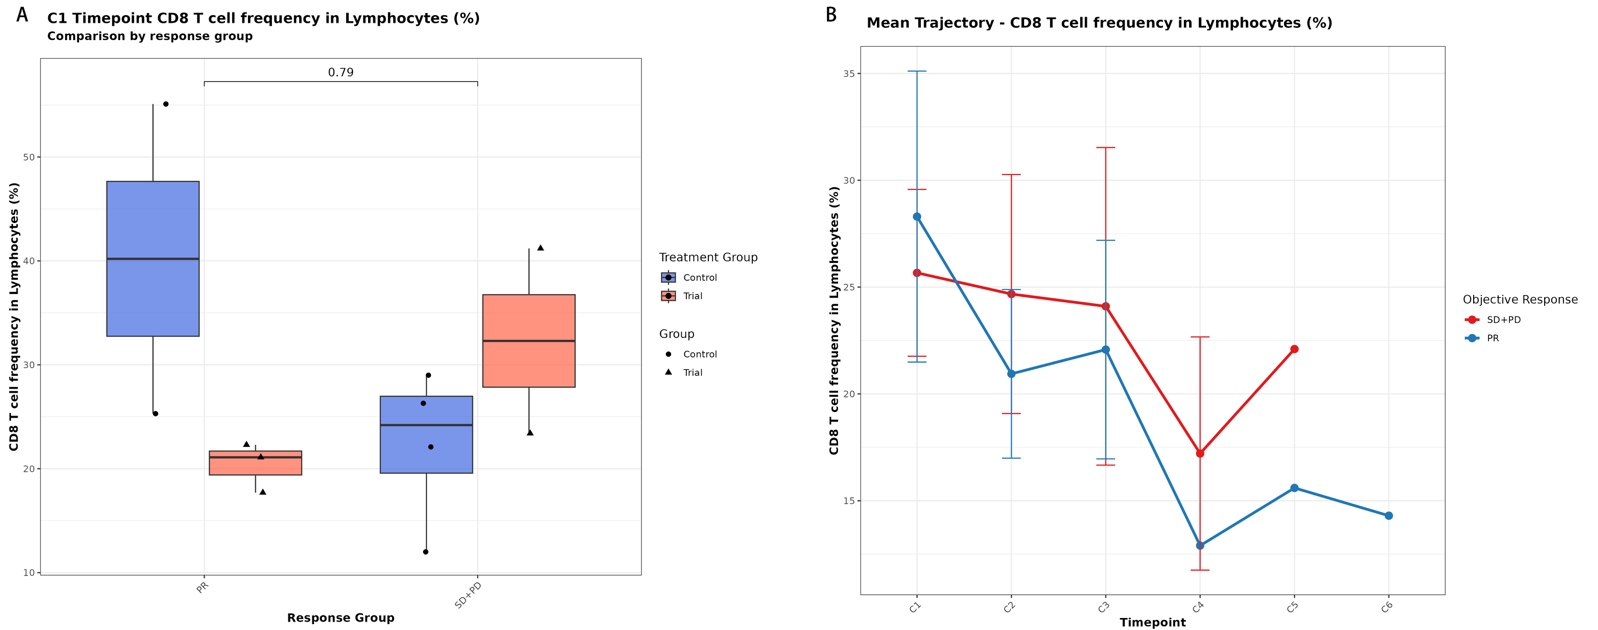


**Figure S9.** **CD8+ T cell frequency in peripheral blood at baseline and its trajectory during treatment.** A. Baseline CD8+ T cell frequency in peripheral blood revealed no significant differences among the treatment groups. B. Trajectory changes in CD8+ T cell frequency in peripheral blood are presented according to objective response. C1~C6 on the x-axis of Figure B represent Cycle 1~Cycle 6.


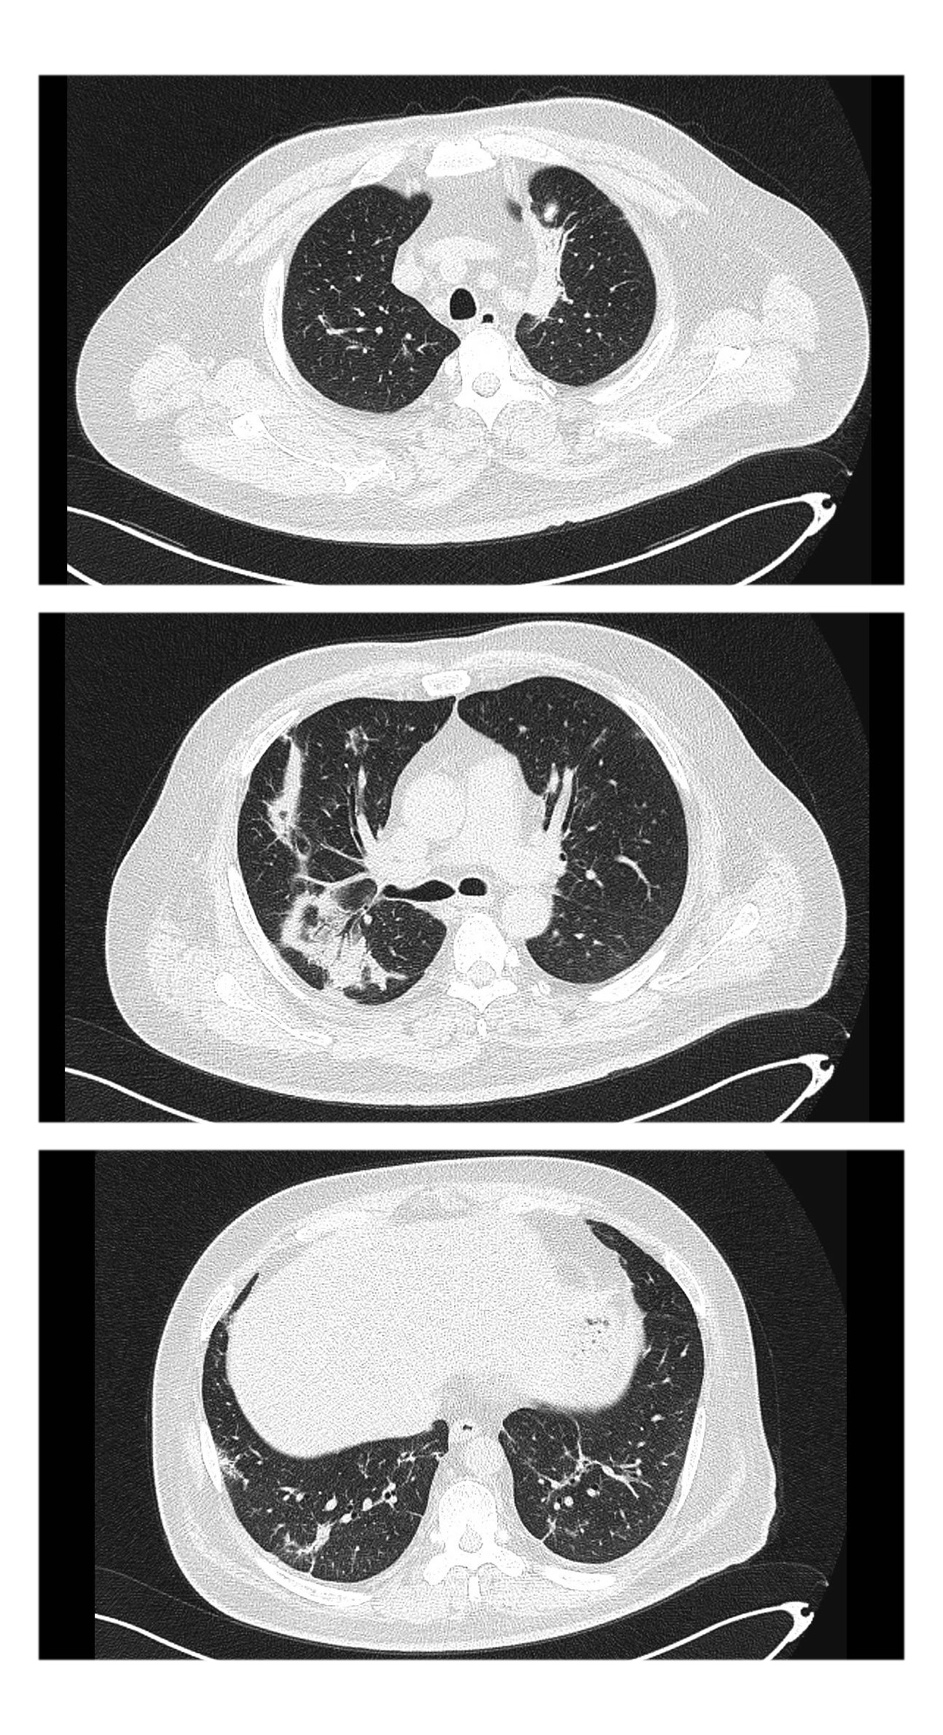


**Figure S10. Chest computed tomography (CT) present remission of the interstitial pneumonia.**
